# Supplementary material for: Effect of tranexamic acid on the prognosis of patients with traumatic brain injury undergoing craniotomy: study protocol for a randomised controlled trial
Source: PubMed Central journal article supplement — BMJ Open. 2021 Nov 25;11(11):e049839. doi: 10.1136/bmjopen-2021-049839 (PMC8627390; doi:10.1136/bmjopen-2021-049839), 2021-11-25
Supplement: bmjopen-2021-049839.draft_revisions.pdf [file bmjopen-2021-049839.draft_revisions.pdf]

# BMJ Open

BMJ Open is committed to open peer review. As part of this commitment we make the peer review history of every article we publish publicly available.

When an article is published we post the peer reviewers' comments and the authors' responses online. We also post the versions of the paper that were used during peer review. These are the versions that the peer review comments apply to.

The versions of the paper that follow are the versions that were submitted during the peer review process. They are not the versions of record or the final published versions. They should not be cited or distributed as the published version of this manuscript.

BMJ Open is an open access journal and the full, final, typeset and author-corrected version of record of the manuscript is available on our site with no access controls, subscription charges or pay-per-view fees (<http://bmjopen.bmj.com>).

If you have any questions on BMJ Open's open peer review process please email [info.bmjopen@bmj.com](mailto:info.bmjopen@bmj.com)

# BMJ Open

## Effect of tranexamic acid on the prognosis of patients with traumatic brain injury undergoing craniotomy: study protocol for a randomized controlled trial

|                               |                                                                                                                                                                                                                                                                                                                                                                                                           |
|-------------------------------|-----------------------------------------------------------------------------------------------------------------------------------------------------------------------------------------------------------------------------------------------------------------------------------------------------------------------------------------------------------------------------------------------------------|
| Journal:                      | <i>BMJ Open</i>                                                                                                                                                                                                                                                                                                                                                                                           |
| Manuscript ID                 | bmjopen-2021-049839                                                                                                                                                                                                                                                                                                                                                                                       |
| Article Type:                 | Protocol                                                                                                                                                                                                                                                                                                                                                                                                  |
| Date Submitted by the Author: | 03-Feb-2021                                                                                                                                                                                                                                                                                                                                                                                               |
| Complete List of Authors:     | Wu, Bei; Capital Medical University, Anesthesiology<br>Lu, Yu; Capital Medical University, Anesthesiology<br>Yu, Yun; Beijing Tiantan Hospital, Anaesthesiology<br>Yue, Hongli; Capital Medical University, Anesthesiology<br>Wang, Jie; Capital Medical University, Anesthesiology<br>Chong, Yingzi; Capital Medical University, Anesthesiology<br>Cui, Weihua; Beijing Tiantan Hospital, Anesthesiology |
| Keywords:                     | Anaesthesia in neurology < ANAESTHETICS, Neurological injury < NEUROLOGY, Neurosurgery < SURGERY, Bleeding disorders & coagulopathies < HAEMATOLOGY                                                                                                                                                                                                                                                       |
|                               |                                                                                                                                                                                                                                                                                                                                                                                                           |

SCHOLARONE™  
Manuscripts

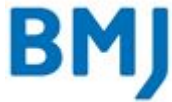

I, the Submitting Author has the right to grant and does grant on behalf of all authors of the Work (as defined in the below author licence), an exclusive licence and/or a non-exclusive licence for contributions from authors who are: i) UK Crown employees; ii) where BMJ has agreed a CC-BY licence shall apply, and/or iii) in accordance with the terms applicable for US Federal Government officers or employees acting as part of their official duties; on a worldwide, perpetual, irrevocable, royalty-free basis to BMJ Publishing Group Ltd ("BMJ") its licensees and where the relevant Journal is co-owned by BMJ to the co-owners of the Journal, to publish the Work in this journal and any other BMJ products and to exploit all rights, as set out in our [licence](#).

The Submitting Author accepts and understands that any supply made under these terms is made by BMJ to the Submitting Author unless you are acting as an employee on behalf of your employer or a postgraduate student of an affiliated institution which is paying any applicable article publishing charge ("APC") for Open Access articles. Where the Submitting Author wishes to make the Work available on an Open Access basis (and intends to pay the relevant APC), the terms of reuse of such Open Access shall be governed by a Creative Commons licence – details of these licences and which [Creative Commons](#) licence will apply to this Work are set out in our licence referred to above.

Other than as permitted in any relevant BMJ Author's Self Archiving Policies, I confirm this Work has not been accepted for publication elsewhere, is not being considered for publication elsewhere and does not duplicate material already published. I confirm all authors consent to publication of this Work and authorise the granting of this licence.

[在此处键入]

[在此处键入]

Version 1.0 Date 2021/2/3

# Effect of tranexamic acid on the prognosis of patients with traumatic brain injury undergoing craniotomy: study protocol for a randomized controlled trial

Bei Wu, Yu Lu, Yun Yu, Hongli Yue, Jie Wang, Yingzi Chong, Weihua Cui  
Anesthesiology, Beijing Tian Tan Hospital, Capital Medical University, Beijing, China

**Correspondence to Dr Weihua Cui; Adress:** Department of Anesthesiology Beijing Tian Tan Hospital Capital Medical University No.119, Nan Si Huan Xi Lu, Beijing 100070; **Email:** [alexandarcc@gmail.com](mailto:alexandarcc@gmail.com).

## Abstract

**Introduction** Abnormal coagulation function aggravate the prognosis of patients with traumatic brain injury (TBI). It was reported that the anti-fibrinolytic drug tranexamic acid (TXA) could reduce intracranial hemorrhage and mortality in non-operative TBI patients. However, there is a lack of evaluation of TXA in TBI patients undergoing craniotomy.

**Methods and analysis** This is a single-centre randomized controlled, double-blind, parallel study aiming to investigate the effectiveness and safety of TXA in TBI patients during the perioperative period. Neurological function, mortality, adverse events, blood loss and transfusion, serum immune-inflammatory cytokines will be collected and analysed.

**Ethics and dissemination** Ethical approval has been granted by the Medical Ethics Committee of Beijing Tian Tan Hospital, Capital Medical University (reference number: KY 2020-136-03). The results of this study will be disseminated through presentations at scientific conferences and publication in scientific journals.

**Trial registration number** ChiCTR2100041911.

## Strengths and limitation of this study

- This is a randomized controlled, double-blind, parallel study to test the hypothesis that TXA could improve the prognosis of TBI patients undergoing craniotomy.
- The study will provide evidence for optimizing the perioperative treatment of TBI patients undergoing craniotomy.
- There are nearly seven hundred cases of TBI patients that need neurosurgery every year at Beijing Tiantan Hospital, Capital Medical University. It is feasible and reasonable to complete the trial in 2 years.
- The study may not be generalized to other populations since it is a single-centre trial.

**Key words** Traumatic brain injury; Traumatic coagulation disorder; Tranexamic acid; The inflammatory response

## Introduction

About 1.5 million people die each year from traumatic brain injury (TBI), which has

[在此处键入]

[在此处键入]

Version 1.0 Date 2021/2/3

become the leading cause of death and disability worldwide. Brain tissue injury and hemorrhage are the main clinical manifestations of TBI. Systemic inflammatory reaction and abnormal coagulation function after TBI can cause secondary brain injury and aggravate cerebral hemorrhage, which has extremely adverse effect on the prognosis.

In recent years, many studies have shown that abnormal coagulation function is common in TBI patients and is one of the main causes of secondary brain injury. The incidence of coagulation dysfunction on admission is about 26% in TBI patients, and over 60% of them with severe TBI[1]. A prospective study found that TBI patients with abnormal coagulation function had a 4.7-fold increase in mortality and an increased risk of poor prognosis compared with those without abnormal coagulation function[2]. Some studies have confirmed the interaction between abnormal coagulation function, hyperfibrinolysis and systemic inflammatory reactions.

Tranexamic Acid (TXA) have anti-fibrinolytic and anti-inflammatory effect. Studies have reported that early use of TXA can reduce blood loss and mortality in TBI patients with non-surgical treatment [3, 4]. Some studies[5-9] suggested that the use of TXA could reduce the mortality and disability of the TBI patients and probably does not increase the risk of adverse events. TXA may be a potential treatment for TBI patients.

It is generally believed that the abnormal coagulation function after TBI is closely related to the degree of brain tissue damage. Studies have shown that more than 60% of patients with severe TBI are accompanied by abnormal coagulation function [1]. The incidence of abnormal coagulation function is increased in TBI patients combined with systemic injury compared with simple TBI patients[10].

Kearney et al have found that the patients with penetrative TBI, compared with non-penetrating TBI patients, have a higher mortality rate and a higher degree of abnormality in Glasgow Coma Scale (GCS), Simplify acute Physiological Score (SAPS) and Disseminated intravascular coagulation (DIC)[11]. However, TBI patients requiring craniotomy for hematoma removal are almost those with severe craniocerebral trauma, who is complicated by severe systemic inflammatory response and coagulation dysfunction. It is not clear, that for emergency TBI patients who need craniotomy, whether the use of TXA can improve the prognosis. It still needs further research to determine the effect of TXA on the systemic inflammatory reaction and coagulation function in TBI patients who received craniotomy procedures.

To sum up, this study intends to evaluate the efficacy and safety of intravenously administration of TXA in TBI patients undergoing craniotomy procedures. We also aim to explore the impact of TXA on systemic inflammatory response and coagulation function of the patients, and the relationship between these effects and the prognosis. This study will provide the basis for further development of perioperative TXA usage in TBI patients and optimize the perioperative treatment plan for TBI patients.

## Methods

### Study design

This study is a single-centre randomized double-blind placebo-controlled parallel study.

### Objectives

[在此处键入]

[在此处键入]

Version 1.0 Date 2021/2/3

This trial aims to investigate the effect and safety of TXA in TBI patients during the perioperative period.

### **Inclusion criteria**

TBI patients aged  $\geq 18$  years and  $\leq 65$  years who scheduled to receive craniotomy hematoma removal surgery in Beijing Tian Tan Hospital , Capital Medical University from 2021 to 2023 will be recruited consecutively for eligibility screening.

### **Exclusion criteria**

Patients will be excluded if they have the circumstances below: allergic history to TXA; using thrombin; taking anticoagulants; consumptive coagulation disorder; history of thrombosis (deep vein thrombosis, pulmonary embolism, cerebral thrombosis, myocardial infarction, thrombophlebitis); renal insufficiency; pregnancy; epilepsy; mental illness.

### **Randomization and blinding**

We will prepare TXA and saline injections in the same colorless and transparent packaging. A full-time quality control person not involved in clinical treatment shall be set up. This person will pack the injections into opaque envelopes blindly, with one drug corresponding to one number. Each envelope includes: eight TXA (250mg/5ml) injections or eight 0.9% saline injections and one sterile 50ml syringe. After the patient signs the informed consent form and enters the operating room, the anesthesiologist will inform the quality control person to generate the random sequence through the computer and obtain the sealed envelope with corresponding number. Ensure that treatment information is concealed from anesthesiologists, nurses, surgeons, and the follow-up staff.

### **Grouping**

According to whether TXA is used or not, patients will be randomly divided into TXA treatment group (TXA group) and placebo group (P group).

### **Intervention**

The TXA group will be given TXA 2g (40ml). The P group will be given a placebo (0.9% normal saline, 40ml). After the patient is routinely monitored in the operating room and the peripheral vein is established, injections will be pumped at the rate of 80ml/hour for 15min (loading dose, 1g), and then 2.5ml/hour until the injection is completed (maintenance dose, 1g for 8h).

### **Anesthesia management**

Standardized procedure will be applied. After the patient enters the operating room (room temperature is 24 °C ~ 26 °C), non-invasive blood pressure, electrocardiogram, pulse blood oxygen, anesthesia gas monitoring and body temperature will be routinely monitored. The experimental drugs are pumped intravenously according to groups. Induction drugs include sufentanil (0.3 ~ 0.4 mg/kg), etomidate (0.3~ 0.4 mg/kg), and rocuronium (0.6 mg/kg). After induction, endotracheal intubation is followed and the respiratory parameters are adjusted to maintain PCO<sub>2</sub> within physiological range (35-45 cmH<sub>2</sub>O). Arterial and central venous catheterization will be established. Intraoperative anesthesia will be adjusted with propofol (2 ~ 6 mg/kg/hour ), remifentanyl (0.1~0.2 mg/kg/min) and sevoflurane (0.5~1%) to maintain the MAP  $\geq$

[在此处键入]

[在此处键入]

Version 1.0 Date 2021/2/3

60mmHg, and muscle relaxants will be added when necessary. After the operation, the tracheal catheter will be kept or removed (depending on circumstances of patients) and patients will be transferred to intensive care unit (ICU) or neurosurgical ward.

### **Patient and public involvement**

Patients and the public will not be involved in the development of the research question or the design of the study. Study results will be disseminated by publication in a medical journal and poster presentation at a medical conference.

### **Primary outcome**

The primary outcome is the Glasgow outcome scale-extended (GOSE) [12] at discharge. GOSE includes 8 categories: Dead, Vegetative State, Lower Severe Disability, Upper Severe Disability, Lower Moderate Disability, Upper Moderate Disability, Lower Good Recovery, and Upper Good Recovery. Good interrater reliability and content validity have been demonstrated for the GOSE in clinical outcome evaluation in TBI patients.

### **Secondary outcome**

- 30-day mortality rate after surgery.
- Thrombotic events during hospitalization: include myocardial infarction, pulmonary embolism, deep vein thrombosis, and cerebral infarction.
- Perioperative blood loss: blood loss during the operation and the postoperative drainage in ICU and ward
- Blood transfusion: blood transfusion during the operation and postoperatively in ICU and ward, including red blood cells, fresh frozen plasma, fibrinogen and platelets.
- Incidence of postoperative infection: include pulmonary infection, incision infection, intracranial infection and urinary system infection.
- Hospitalization mortality rate.
- Length of hospitalization.
- Hospitalization costs.
- Coma Recovery Scale score-Revised (CRS-R) [13] at discharge: CRS-R will be applied to assess the quality of recovery of the TBI patients at discharge.
- Biomarkers: 3ml blood will be collected from the patients before, 1 day and 7 days after surgery. Blood will be centrifuged for 3000 rotation for 10 minutes, and the supernatant is collected and stored at -80 °C. Serological tests include: Traumatic stress index: Adrenocorticotropic hormone (ACTH), adrenaline (AD), Norepinephrine (NE), cortisol, lactic acid. Immune inflammatory factors: Human monocyte chemoattractant protein-1 (MCP-1), tumor necrosis factor- $\alpha$  (TNF- $\alpha$ ), C reactive protein (CRP), peripheral blood leukocyte count and classification, interleukin-1, IL-6, and IL-10.

### **Follow-up**

Clinical prognosis of postoperative outcomes will be collected through telephone or interview 30 days and 3 months after discharge, including acute cerebral ischemia, cerebral hemorrhage, dominant stroke, transient ischemic attack, death, myocardial infarction, non-fatal myocardial injury, major cardiovascular adverse events, hemorrhage, new onset atrial fibrillation, hypotension, congestive heart failure, new

[在此处键入]

[在此处键入]

Version 1.0 Date 2021/2/3

onset acute renal failure and infection.

### Sample size estimates

We used the PASS 2008 software (NCSS LLC, USA) for Windows to calculate the sample size. Based on our previous retrospective studies, the severe disability (Glasgow outcome score 1~3) rate undergoing craniotomy hematoma removal was 54%. The sample size was calculated with the model of Test for Two Means [Differences] in PASS V.11 software (NCSS, Kaysville, Utah, USA) on the basis of the anticipated the severe disability rate to reduce by 15% (54% to 46%). Given an alpha level of 0.05, a beta level of 0.2, the total sample size required is 613 in each group. Therefore, 1226 patients will be enrolled in this study.

### Statistical plan

STATA statistical software will be used. Quantitative data variables will be expressed as mean  $\pm$  standard deviation, quantitative data with non-normal distribution are expressed as median (interquartile interval), and qualitative data use cases (percentage). For continuous data, the normality test will be performed first. If each group meets the normality and the variance between the two groups is equal, the T-test will be used for comparison between groups. Otherwise, non-parametric Wilcoxon rank sum test or Mann-Whitney test will be considered. For the classified data, the chi-square test or Fisher's exact probability test will be used for the unordered outcomes, and the non-parametric Wilcoxon rank sum test for the ordered data. For statistical analysis, GOSE 1-4 will be defined as unfavorable outcome, GOSE 5-8 are defined as favorable outcome. Multivariate regression analysis will be used to evaluate the primary outcome. Multivariate analysis and linear regression will be used to evaluate the relationship between the outcome indicators.

### Adverse Events

All study-related adverse events will be closely monitored, and details such as the nature, severity, and treatment will be recorded on the CRF until they are resolved, and the patient is stable. Whenever an adverse event occurs, it will be reported to the principal investigator immediately, and the severity, cause and consequences will be determined. All adverse events will be compared between the groups using the chi-square test or Fisher's exact test.

### Discussion

This study is a single-centre randomized double-blind placebo-controlled parallel study. To evaluate the influence of perioperative intravenous TXA treatment on the prognosis of TBI patients undergoing craniotomy for hematoma removal after emergency admission to Beijing Tian Tan Hospital. We also want to explore the influence of TXA on perioperative coagulation function and systemic inflammatory response of patients and its relationship with prognosis.

The World Health Organization has declared TBI to be the leading cause of death and disability worldwide by 2020[14]. Cerebral hemorrhage is the main clinical manifestation of TBI, and traumatic coagulation disorder is the main cause of progressive aggravation of cerebral hemorrhage. Studies have reported that the incidence of abnormal coagulation function after TBI is 35.2 % (29.0 % - 41.4 %), and



[在此处键入]

[在此处键入]

Version 1.0 Date 2021/2/3

the mortality rate of patients with simple TBI complicated with abnormal coagulation function is 17-86 % [15]. Compared with TBI patients without coagulation dysfunction, the mortality rate of TBI patients with coagulation dysfunction is 4.7 times higher, and the risk of poor prognosis is also increased[2]. The abnormal coagulation function after TBI is directly related to the degree of brain tissue damage[11]. In addition, systemic inflammatory response after TBI can aggravate coagulation dysfunction in TBI patients, which is one of the important causes of secondary brain injury [16].

Studies suggest that the main mechanism leading to abnormal coagulation function after TBI is the activation of tissue plasminogen, hyperfibrinolysis, and disruption of the balance between coagulation and bleeding[17]. After severe TBI, a strong stress response occurs, which then induces systemic inflammatory response syndrome, leading to increased bleeding, increased blood transfusion, systemic organ failure, aggravating patients' abnormal coagulation function, and resulting in increased mortality [18, 19]. In addition, excessive consumption of coagulation factors and platelet dysfunction[20], hypoperfusion and protein-C pathway activation, hypothermia, metabolic acidosis, and hemodilution can also lead to coagulation dysfunction after TBI [21]. In TBI patients, the blood-brain barrier is destroyed, fibrinogen and its degradation products enter the brain, activate the inflammatory reaction cascade and the immune response in the brain, leading to lymphocyte infiltration, glial cell activation, cytokine release and reactive oxygen element production in the brain. These lead to axonal demyelination and neuronal damage[22]. Therefore, abnormal coagulation function significantly increases the mortality of patients, the regulation of patients' coagulation function has great clinical significance for improving the prognosis of patients, which has attracted more and more attention.

TXA is an anti-fibrinolytic drug that competitively binds to the fibrinolytic lysine binding sites and inhibits the fibrinolytic effect of fibrinolytic enzymes. On the other hand, it has anti-inflammatory effects. Plasmin activates and upregulates a cascade of inflammatory responses by activating pre-inflammatory cells and inducing pre-inflammatory gene expression [23]. TXA blocks this inflammatory activation by inhibiting the conversion of plasminogen to plasmin. Patients undergoing cardiopulmonary bypass and orthopedic joint replacement are generally treated with TXA to reduce systemic inflammation and blood loss [24].

TXA is widely used in surgical patients who need blood transfusion and hemostatic treatment. It can reduce the risk of bleeding and mortality in patients with TBI [5]. A large randomized controlled study (CRASH-2) involving 20,000 patients in 40 countries found that treatment with TXA within one hour after acute TBI reduced the risk of death from bleeding by 30%; Treatment with TXA 1 to 3 hours after trauma reduced the risk of death by 20%. Therefore, TXA may be a potential treatment for TBI patients. However, for TBI patients undergoing craniotomy for hematoma removal, there is still less evidence of the influence of TXA on their prognosis.

Safety is also our important consideration. TXA has been suggested to be at risk of cerebral thrombosis and secondary cerebral ischemia[25]. Cerebral ischemia is a secondary injury after TBI, which can aggravate neurological dysfunction and increase the mortality and disability[26, 27]. TXA may also increase intracranial pressure,

[在此处键入]

[在此处键入]

Version 1.0 Date 2021/2/3

leading to intracranial hypo-perfusion [28, 29]. Thrombotic intravascular coagulation increased the incidence of intracerebral microthrombi [30]. However, a number of studies have shown that TXA is safe for TBI patients[6-8]. A multicentric, large-sample randomized controlled study (CRASH-3) found that TXA reduced the mortality of mild to moderate TBI patients without increasing the risk of thrombosis events(RR 0.98 (0.74-1.28), and there was no significant difference in the risk of epilepsy compared with the placebo group (1.09 [95% CI 0.90-1.33])[9]. Recently, a Meta-analysis reported that TXA probably does not increase the risk of adverse events [31].

To sum up, scientific and effective treatments for TBI patients are needed, and coagulation function is an important clinical indicator affecting the prognosis of TBI patients. In this study, we aim at investigating the effect and safety of perioperative intravenous administration of TXA in TBI patients undergoing craniotomy. We also want to explore the effect of TXA on the inflammatory response and the coagulation function of TBI patients, as well as its relationship with the prognosis. We are aimed at providing a basis for the perioperative TXA treatment for TBI patients and optimizing the perioperative treatment plan for TBI patients.

### Summary

In summary, the study aims to investigate the effect and safety of TXA in TBI patients undergoing neurosurgery for hematoma removal. If the result of this study is positive, it will provide evidence for optimal perioperative treatment to improve the prognosis of TBI patients who need craniotomy.

### Dissemination

The results of this study will be disseminated through presentations at scientific conferences and publication in scientific journals.

### Informed Consent

All participants in this trial will sign informed consent documents. Moreover, all participants will be given sufficient time to decide whether to participate in this study. The entrusted agent (relatives or legal representatives) of the patients who participate in the study will have the right to obtain all relevant information, and they will be allowed to withdraw their consent or discontinue participation without restrictions at any time during the study. The confidentiality of participant records will be protected.

### Timeline

The study will take approximately 2 years to complete enrolment and outcome assessment. The trial was registered at [chictr.org.cn](http://chictr.org.cn) on 10 January 2021 (identifier ChiCTR2100041911). The study was approved by the Institutional Review Board at Beijing Tian Tan Hospital, Capital Medical University on 5 January 2021 (reference number KY2020-136-03).

### Audits

The data monitoring committee will conduct audits through regular interviews, letters

[在此处键入]

[在此处键入]

Version 1.0 Date 2021/2/3

or telephone. The data monitoring committee reserves the right to audit the recruitment of patients at any time. The auditing process will be independent from the investigators.

### **Amendments to the protocol**

Amendments to the protocol will only be made by academic committee and with the approval of the Medical Ethics Committee, Beijing Tiantan Hospital, Capital Medical University. All modifications will be recorded. Any modifications will be applied to all subsequent patients, and the registration record will be updated.

**Contributors** BW was involved in the conception and design, data collection and analysis, and manuscript writing. WC and YL were involved in the conception and design, data collection and analysis, and manuscript revision. YY, JW, HY and YC were involved in the conception and design, data collection, and manuscript revision. All authors have read and approved the final manuscript.

**Funding** This work was supported by the following grants: Beijing Hospital Authority Youth Programme (grant number: QML20190508), National Natural Science Foundation of China (grant number: 81870865), Beijing Municipal Administration of Hospitals Incubating Program (grant number: PX2019019).

**Ethics approval** All procedures in the trial will be conducted in accordance with the World Medical Association's "Helsinki Declaration (version 19 October 2013)". The study plan (protocol version 1.0) was approved by the Ethics Committee of Beijing Tian Tan Hospital, Capital Medical University, China (KY 2020-136-03). This study protocol has been registered at [chictr.org.cn](http://chictr.org.cn) (ChiCTR2100041911).

**Open Access** This is an open access article distributed in accordance with the Creative Commons Attribution Non Commercial (CC BY- NC 4.0) license, which permits others to distribute, remix, adapt, build upon this work non- commercially, and license their derivative works on different terms, provided the original work is properly cited, appropriate credit is given, any changes made indicated, and the use is non- commercial. See: <http://creativecommons.org/licenses/by-nc/4.0/>.

**Competing interests** None declared.

**Patient consent for publication** Not required.

**Provenance and peer review** Not commissioned; externally peer reviewed.

### **References**

1. de Oliveira Manoel AL, Neto AC, Veigas PV, Rizoli S: **Traumatic brain injury associated coagulopathy**. *Neurocrit Care* 2015, **22**(1):34-44.

[在此处键入]

[在此处键入]

Version 1.0 Date 2021/2/3

2. Albert V, Arulsevi S, Agrawal D, Pati HP, Pandey RM: **Early posttraumatic changes in coagulation and fibrinolysis systems in isolated severe traumatic brain injury patients and its influence on immediate outcome.** *Hematol Oncol Stem Cell Ther* 2019, **12**(1):32-43.
3. collaborators C-, Roberts I, Shakur H, Afolabi A, Brohi K, Coats T, Dewan Y, Gando S, Guyatt G, Hunt BJ *et al.* **The importance of early treatment with tranexamic acid in bleeding trauma patients: an exploratory analysis of the CRASH-2 randomised controlled trial.** *Lancet* 2011, **377**(9771):1096-1101, 1101 e1091-1092.
4. collaborators C-t, Shakur H, Roberts I, Bautista R, Caballero J, Coats T, Dewan Y, El-Sayed H, Gogichaishvili T, Gupta S *et al.* **Effects of tranexamic acid on death, vascular occlusive events, and blood transfusion in trauma patients with significant haemorrhage (CRASH-2): a randomised, placebo-controlled trial.** *Lancet* 2010, **376**(9734):23-32.
5. Yokobori S, Yatabe T, Kondo Y, Kinoshita K, Japan Resuscitation Council Neuroresuscitation Task F, the Guidelines Editorial C: **Efficacy and safety of tranexamic acid administration in traumatic brain injury patients: a systematic review and meta-analysis.** *J Intensive Care* 2020, **8**:46.
6. Perel P, Al-Shahi Salman R, Kawahara T, Morris Z, Prieto-Merino D, Roberts I, Sandercock P, Shakur H, Wardlaw J: **CRASH-2 (Clinical Randomisation of an Antifibrinolytic in Significant Haemorrhage) intracranial bleeding study: the effect of tranexamic acid in traumatic brain injury—a nested randomised, placebo-controlled trial.** *Health Technol Assess* 2012, **16**(13):iii-xii, 1-54.

[在此处键入]

[在此处键入]

Version 1.0 Date 2021/2/3

- 1  
2  
3  
4 7. Yutthakasemsunt S, Kittiwatanagul W, Piyavechvirat P, Thinkamrop B, Phuenpathom  
5  
6 N, Lumbiganon P: **Tranexamic acid for patients with traumatic brain injury: a**  
7  
8 **randomized, double-blinded, placebo-controlled trial.** *BMC Emerg Med* 2013, **13**:20.  
9  
10
- 11  
12 8. Ker K, Roberts I, Shakur H, Coats TJ: **Antifibrinolytic drugs for acute traumatic injury.**  
13  
14 *Cochrane Database Syst Rev* 2015(5):CD004896.  
15  
16
- 17 9. collaborators C-t: **Effects of tranexamic acid on death, disability, vascular occlusive**  
18  
19 **events and other morbidities in patients with acute traumatic brain injury (CRASH-3): a**  
20  
21 **randomised, placebo-controlled trial.** *Lancet* 2019, **394**(10210):1713-1723.  
22  
23
- 24 10. Maegele M, Schochl H, Menovsky T, Marechal H, Marklund N, Buki A, Stanworth S:  
25  
26 **Coagulopathy and haemorrhagic progression in traumatic brain injury: advances in**  
27  
28 **mechanisms, diagnosis, and management.** *Lancet Neurol* 2017, **16**(8):630-647.  
29  
30
- 31 11. Kearney TJ, Benth L, Grode M, Lee S, Hiatt JR, Shabot MM: **Coagulopathy and**  
32  
33 **catecholamines in severe head injury.** *J Trauma* 1992, **32**(5):608-611; discussion 611-  
34  
35 602.  
36  
37
- 38 12. Yeatts SD, Martin RH, Meurer W, Silbergleit R, Rockswold GL, Barsan WG, Korley FK,  
39  
40 Wright DW, Gajewski BJ: **Sliding Scoring of the Glasgow Outcome Scale-Extended as**  
41  
42 **Primary Outcome in Traumatic Brain Injury Trials.** *J Neurotrauma* 2020, **37**(24):2674-  
43  
44 2679.  
45  
46
- 47 13. Sattin D, Minati L, Rossi D, Covelli V, Giovannetti AM, Rosazza C, Bersano A, Nigri A,  
48  
49 Leonardi M: **The Coma Recovery Scale Modified Score: a new scoring system for the**  
50  
51 **Coma Recovery Scale-revised for assessment of patients with disorders of**  
52  
53 **consciousness.** *Int J Rehabil Res* 2015, **38**(4):350-356.  
54  
55  
56  
57  
58  
59  
60

[在此处键入]

[在此处键入]

Version 1.0 Date 2021/2/3

- 1  
2  
3  
4 14. Hyder AA, Wunderlich CA, Puvanachandra P, Gururaj G, Kobusingye OC: **The impact**  
5  
6 **of traumatic brain injuries: a global perspective.** *NeuroRehabilitation* 2007, **22(5):341-**  
7  
8 353.
- 9  
10  
11 15. Epstein DS, Mitra B, O'Reilly G, Rosenfeld JV, Cameron PA: **Acute traumatic**  
12  
13 **coagulopathy in the setting of isolated traumatic brain injury: a systematic review and**  
14  
15 **meta-analysis.** *Injury* 2014, **45(5):819-824.**
- 16  
17  
18 16. Brain Trauma F, American Association of Neurological S, Congress of Neurological S,  
19  
20 Joint Section on N, Critical Care AC, Bratton SL, Chestnut RM, Ghajar J, McConnell  
21  
22 Hammond FF, Harris OA *et al.* **Guidelines for the management of severe traumatic**  
23  
24 **brain injury. IX. Cerebral perfusion thresholds.** *J Neurotrauma* 2007, **24 Suppl 1:S59-**  
25  
26 64.
- 27  
28  
29 17. Nakae R, Takayama Y, Kuwamoto K, Naoe Y, Sato H, Yokota H: **Time Course of**  
30  
31 **Coagulation and Fibrinolytic Parameters in Patients with Traumatic Brain Injury.** *J*  
32  
33 *Neurotrauma* 2016, **33(7):688-695.**
- 34  
35  
36 18. Wada T, Gando S, Maekaw K, Katabami K, Sageshima H, Hayakawa M, Sawamura  
37  
38 **A: Disseminated intravascular coagulation with increased fibrinolysis during the early**  
39  
40 **phase of isolated traumatic brain injury.** *Crit Care* 2017, **21(1):219.**
- 41  
42  
43 19. Walker PF, Foster AD, Rothberg PA, Davis TA, Bradley MJ: **Tranexamic acid**  
44  
45 **decreases rodent hemorrhagic shock-induced inflammation with mixed end-organ**  
46  
47 **effects.** *PLoS One* 2018, **13(11):e0208249.**
- 48  
49  
50 20. Solomon C, Traintinger S, Ziegler B, Hanke A, Rahe-Meyer N, Voelckel W, Schochl H:  
51  
52 **Platelet function following trauma. A multiple electrode aggregometry study.** *Thromb*  
53  
54  
55  
56  
57  
58  
59  
60

[在此处键入]

[在此处键入]

Version 1.0 Date 2021/2/3

- 1  
2  
3  
4 *Haemost* 2011, **106**(2):322-330.
- 5  
6  
7 21. Albert V, Subramanian A, Agrawal D, Pati HP, Gupta SD, Mukhopadhyay AK: **Acute**  
8  
9 **Traumatic Endotheliopathy in Isolated Severe Brain Injury and Its Impact on Clinical**  
10  
11 **Outcome.** *Med Sci (Basel)* 2018, **6**(1).
- 12  
13  
14 22. Ziliotto N, Bernardi F, Jakimovski D, Zivadinov R: **Coagulation Pathways in**  
15  
16 **Neurological Diseases: Multiple Sclerosis.** *Front Neurol* 2019, **10**:409.
- 17  
18  
19 23. Singleton Q, Vaibhav K, Braun M, Patel C, Khayrullin A, Mendhe B, Lee BR, Kolhe R,  
20  
21 Kaiser H, Awad ME *et al.* **Bone Marrow Derived Extracellular Vesicles Activate**  
22  
23 **Osteoclast Differentiation in Traumatic Brain Injury Induced Bone Loss.** *Cells* 2019,  
24  
25  
26  
27 **8**(1).
- 28  
29  
30 24. Wang D, Yang Y, He C, Luo ZY, Pei FX, Li Q, Zhou ZK, Zeng WN: **Effect of Multiple**  
31  
32 **Doses of Oral Tranexamic Acid on Haemostasis and Inflammatory Reaction in Total**  
33  
34 **Hip Arthroplasty: A Randomized Controlled Trial.** *Thromb Haemost* 2019, **119**(1):92-  
35  
36  
37  
38 103.
- 39  
40 25. Gando S, Sawamura A, Hayakawa M: **Trauma, shock, and disseminated intravascular**  
41  
42 **coagulation: lessons from the classical literature.** *Ann Surg* 2011, **254**(1):10-19.
- 43  
44  
45 26. Mazzeo AT, Kunene NK, Choi S, Gilman C, Bullock RM: **Quantitation of ischemic**  
46  
47 **events after severe traumatic brain injury in humans: a simple scoring system.** *J*  
48  
49 *Neurosurg Anesthesiol* 2006, **18**(3):170-178.
- 50  
51  
52  
53 27. Hulka F, Mullins RJ, Frank EH: **Blunt brain injury activates the coagulation process.**  
54  
55  
56 *Arch Surg* 1996, **131**(9):923-927; discussion 927-928.
- 57  
58  
59 28. Burke JF, Stulc JI Fau - Skolarus LE, Skolarus Le Fau - Sears ED, Sears Ed Fau -  
60

[在此处键入]

[在此处键入]

Version 1.0 Date 2021/2/3

- Zahuranec DB, Zahuranec Db Fau - Morgenstern LB, Morgenstern LB: **Traumatic brain injury may be an independent risk factor for stroke.** (1526-632X (Electronic)).
29. Baharoglu MI, Germans MR, Rinkel GJ, Algra A, Vermeulen M, van Gijn J, Roos YB: **Antifibrinolytic therapy for aneurysmal subarachnoid haemorrhage.** *Cochrane Database Syst Rev* 2013(8):CD001245.
30. Kaufman HH, Hui KS, Mattson JC, Borit A, Childs TL, Hoots WK, Bernstein DP, Makela ME, Wagner KA, Kahan BD *et al.* **Clinicopathological correlations of disseminated intravascular coagulation in patients with head injury.** *Neurosurgery* 1984, **15**(1):34-42.
31. Lawati KA, Sharif S, Maqbali SA, Rimawi HA, Petrosoniak A, Belley-Cote EP, Sharma SV, Morgenstern J, Fernando SM, Owen JJ *et al.* **Efficacy and safety of tranexamic acid in acute traumatic brain injury: a systematic review and meta-analysis of randomized-controlled trials.** *Intensive Care Med* 2021, **47**(1):14-27.



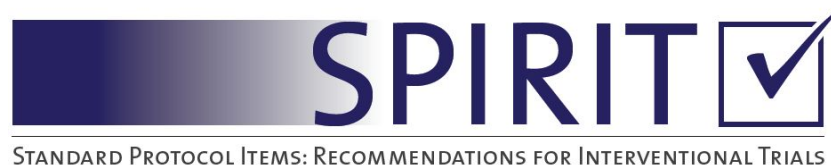

SPIRIT 2013 Checklist: Recommended items to address in a clinical trial protocol and related documents\*

| Section/item                      | Item No | Description                                                                                                                                                                                                                                                                              | Addressed on page number |
|-----------------------------------|---------|------------------------------------------------------------------------------------------------------------------------------------------------------------------------------------------------------------------------------------------------------------------------------------------|--------------------------|
| <b>Administrative information</b> |         |                                                                                                                                                                                                                                                                                          |                          |
| Title                             | 1       | Descriptive title identifying the study design, population, interventions, and, if applicable, trial acronym                                                                                                                                                                             | ___ 1 ___                |
| Trial registration                | 2a      | Trial identifier and registry name. If not yet registered, name of intended registry                                                                                                                                                                                                     | ___ 1 ___                |
|                                   | 2b      | All items from the World Health Organization Trial Registration Data Set                                                                                                                                                                                                                 | _____                    |
| Protocol version                  | 3       | Date and version identifier                                                                                                                                                                                                                                                              | __ top of page __        |
| Funding                           | 4       | Sources and types of financial, material, and other support                                                                                                                                                                                                                              | ___ 8 ___                |
| Roles and responsibilities        | 5a      | Names, affiliations, and roles of protocol contributors                                                                                                                                                                                                                                  | ___ 1 and 8 ___          |
|                                   | 5b      | Name and contact information for the trial sponsor                                                                                                                                                                                                                                       | ___ 1 ___                |
|                                   | 5c      | Role of study sponsor and funders, if any, in study design; collection, management, analysis, and interpretation of data; writing of the report; and the decision to submit the report for publication, including whether they will have ultimate authority over any of these activities | ___ 8 ___                |
|                                   | 5d      | Composition, roles, and responsibilities of the coordinating centre, steering committee, endpoint adjudication committee, data management team, and other individuals or groups overseeing the trial, if applicable (see Item 21a for data monitoring committee)                         | ___ 7 ___                |

1 **Introduction**

2

3 Background and rationale 6a Description of research question and justification for undertaking the trial, including summary of relevant studies (published and unpublished) examining benefits and harms for each intervention \_\_\_ 1-2 \_\_\_

4

5

6 6b Explanation for choice of comparators \_\_\_ 3 \_\_\_

7

8 Objectives 7 Specific objectives or hypotheses \_\_\_ 1-2 \_\_\_

9

10 Trial design 8 Description of trial design including type of trial (eg, parallel group, crossover, factorial, single group), allocation ratio, and framework (eg, superiority, equivalence, noninferiority, exploratory) \_\_\_ 2 \_\_\_

11

12

13

14 **Methods: Participants, interventions, and outcomes**

15

16 Study setting 9 Description of study settings (eg, community clinic, academic hospital) and list of countries where data will be collected. Reference to where list of study sites can be obtained \_\_\_ 2 \_\_\_

17

18

19 Eligibility criteria 10 Inclusion and exclusion criteria for participants. If applicable, eligibility criteria for study centres and individuals who will perform the interventions (eg, surgeons, psychotherapists) \_\_\_ 3 \_\_\_

20

21

22 Interventions 11a Interventions for each group with sufficient detail to allow replication, including how and when they will be administered \_\_\_ 3 \_\_\_

23

24

25 11b Criteria for discontinuing or modifying allocated interventions for a given trial participant (eg, drug dose change in response to harms, participant request, or improving/worsening disease) \_\_\_\_\_

26

27

28 11c Strategies to improve adherence to intervention protocols, and any procedures for monitoring adherence (eg, drug tablet return, laboratory tests) \_\_\_\_\_

29

30

31 11d Relevant concomitant care and interventions that are permitted or prohibited during the trial \_\_\_\_\_

32

33

34 Outcomes 12 Primary, secondary, and other outcomes, including the specific measurement variable (eg, systolic blood pressure), analysis metric (eg, change from baseline, final value, time to event), method of aggregation (eg, median, proportion), and time point for each outcome. Explanation of the clinical relevance of chosen efficacy and harm outcomes is strongly recommended \_\_\_ 4 \_\_\_

35

36

37

38

39

40 Participant timeline 13 Time schedule of enrolment, interventions (including any run-ins and washouts), assessments, and visits for participants. A schematic diagram is highly recommended (see Figure) \_\_\_ 7 \_\_\_

41

42

43

44

45

46

1 Sample size 14 Estimated number of participants needed to achieve study objectives and how it was determined, including \_\_\_\_\_ 4-5 \_\_\_\_\_  
 2 clinical and statistical assumptions supporting any sample size calculations

3  
 4 Recruitment 15 Strategies for achieving adequate participant enrolment to reach target sample size \_\_\_\_\_  
 5

6 **Methods: Assignment of interventions (for controlled trials)**

7  
 8 Allocation:

9  
 10 Sequence 16a Method of generating the allocation sequence (eg, computer-generated random numbers), and list of any \_\_\_\_\_ 3 \_\_\_\_\_  
 11 generation factors for stratification. To reduce predictability of a random sequence, details of any planned restriction  
 12 (eg, blocking) should be provided in a separate document that is unavailable to those who enrol participants  
 13 or assign interventions  
 14

15  
 16 Allocation 16b Mechanism of implementing the allocation sequence (eg, central telephone; sequentially numbered, \_\_\_\_\_ 3 \_\_\_\_\_  
 17 concealment opaque, sealed envelopes), describing any steps to conceal the sequence until interventions are assigned  
 18 mechanism  
 19

20  
 21 Implementation 16c Who will generate the allocation sequence, who will enrol participants, and who will assign participants to \_\_\_\_\_ 3 \_\_\_\_\_  
 22 interventions  
 23

24 Blinding (masking) 17a Who will be blinded after assignment to interventions (eg, trial participants, care providers, outcome \_\_\_\_\_ 3 \_\_\_\_\_  
 25 assessors, data analysts), and how  
 26

27 17b If blinded, circumstances under which unblinding is permissible, and procedure for revealing a participant's \_\_\_\_\_  
 28 allocated intervention during the trial  
 29  
 30

31 **Methods: Data collection, management, and analysis**

32  
 33 Data collection 18a Plans for assessment and collection of outcome, baseline, and other trial data, including any related \_\_\_\_\_  
 34 methods processes to promote data quality (eg, duplicate measurements, training of assessors) and a description of  
 35 study instruments (eg, questionnaires, laboratory tests) along with their reliability and validity, if known.  
 36 Reference to where data collection forms can be found, if not in the protocol  
 37

38  
 39 18b Plans to promote participant retention and complete follow-up, including list of any outcome data to be \_\_\_\_\_ 4 \_\_\_\_\_  
 40 collected for participants who discontinue or deviate from intervention protocols  
 41  
 42

|    |                                 |     |                                                                                                                                                                                                                                                                                                                                       |               |
|----|---------------------------------|-----|---------------------------------------------------------------------------------------------------------------------------------------------------------------------------------------------------------------------------------------------------------------------------------------------------------------------------------------|---------------|
| 1  | Data management                 | 19  | Plans for data entry, coding, security, and storage, including any related processes to promote data quality (eg, double data entry; range checks for data values). Reference to where details of data management procedures can be found, if not in the protocol                                                                     | _____         |
| 2  |                                 |     |                                                                                                                                                                                                                                                                                                                                       |               |
| 3  |                                 |     |                                                                                                                                                                                                                                                                                                                                       |               |
| 4  |                                 |     |                                                                                                                                                                                                                                                                                                                                       |               |
| 5  | Statistical methods             | 20a | Statistical methods for analysing primary and secondary outcomes. Reference to where other details of the statistical analysis plan can be found, if not in the protocol                                                                                                                                                              | ___ 5 ___     |
| 6  |                                 |     |                                                                                                                                                                                                                                                                                                                                       |               |
| 7  |                                 |     |                                                                                                                                                                                                                                                                                                                                       |               |
| 8  |                                 | 20b | Methods for any additional analyses (eg, subgroup and adjusted analyses)                                                                                                                                                                                                                                                              | ___ 5 ___     |
| 9  |                                 |     |                                                                                                                                                                                                                                                                                                                                       |               |
| 10 |                                 | 20c | Definition of analysis population relating to protocol non-adherence (eg, as randomised analysis), and any statistical methods to handle missing data (eg, multiple imputation)                                                                                                                                                       | _____         |
| 11 |                                 |     |                                                                                                                                                                                                                                                                                                                                       |               |
| 12 |                                 |     |                                                                                                                                                                                                                                                                                                                                       |               |
| 13 |                                 |     |                                                                                                                                                                                                                                                                                                                                       |               |
| 14 | <b>Methods: Monitoring</b>      |     |                                                                                                                                                                                                                                                                                                                                       |               |
| 15 |                                 |     |                                                                                                                                                                                                                                                                                                                                       |               |
| 16 | Data monitoring                 | 21a | Composition of data monitoring committee (DMC); summary of its role and reporting structure; statement of whether it is independent from the sponsor and competing interests; and reference to where further details about its charter can be found, if not in the protocol. Alternatively, an explanation of why a DMC is not needed | ___ 7 ___     |
| 17 |                                 |     |                                                                                                                                                                                                                                                                                                                                       |               |
| 18 |                                 |     |                                                                                                                                                                                                                                                                                                                                       |               |
| 19 |                                 |     |                                                                                                                                                                                                                                                                                                                                       |               |
| 20 |                                 |     |                                                                                                                                                                                                                                                                                                                                       |               |
| 21 |                                 |     |                                                                                                                                                                                                                                                                                                                                       |               |
| 22 |                                 | 21b | Description of any interim analyses and stopping guidelines, including who will have access to these interim results and make the final decision to terminate the trial                                                                                                                                                               | _____         |
| 23 |                                 |     |                                                                                                                                                                                                                                                                                                                                       |               |
| 24 |                                 |     |                                                                                                                                                                                                                                                                                                                                       |               |
| 25 | Harms                           | 22  | Plans for collecting, assessing, reporting, and managing solicited and spontaneously reported adverse events and other unintended effects of trial interventions or trial conduct                                                                                                                                                     | ___ 5 ___     |
| 26 |                                 |     |                                                                                                                                                                                                                                                                                                                                       |               |
| 27 |                                 |     |                                                                                                                                                                                                                                                                                                                                       |               |
| 28 | Auditing                        | 23  | Frequency and procedures for auditing trial conduct, if any, and whether the process will be independent from investigators and the sponsor                                                                                                                                                                                           | ___ 7 ___     |
| 29 |                                 |     |                                                                                                                                                                                                                                                                                                                                       |               |
| 30 |                                 |     |                                                                                                                                                                                                                                                                                                                                       |               |
| 31 |                                 |     |                                                                                                                                                                                                                                                                                                                                       |               |
| 32 | <b>Ethics and dissemination</b> |     |                                                                                                                                                                                                                                                                                                                                       |               |
| 33 |                                 |     |                                                                                                                                                                                                                                                                                                                                       |               |
| 34 | Research ethics approval        | 24  | Plans for seeking research ethics committee/institutional review board (REC/IRB) approval                                                                                                                                                                                                                                             | ___ 1,7,8 ___ |
| 35 |                                 |     |                                                                                                                                                                                                                                                                                                                                       |               |
| 36 |                                 |     |                                                                                                                                                                                                                                                                                                                                       |               |
| 37 | Protocol amendments             | 25  | Plans for communicating important protocol modifications (eg, changes to eligibility criteria, outcomes, analyses) to relevant parties (eg, investigators, REC/IRBs, trial participants, trial registries, journals, regulators)                                                                                                      | ___ 8 ___     |
| 38 |                                 |     |                                                                                                                                                                                                                                                                                                                                       |               |
| 39 |                                 |     |                                                                                                                                                                                                                                                                                                                                       |               |
| 40 |                                 |     |                                                                                                                                                                                                                                                                                                                                       |               |
| 41 |                                 |     |                                                                                                                                                                                                                                                                                                                                       |               |
| 42 |                                 |     |                                                                                                                                                                                                                                                                                                                                       |               |
| 43 |                                 |     |                                                                                                                                                                                                                                                                                                                                       |               |
| 44 |                                 |     |                                                                                                                                                                                                                                                                                                                                       |               |
| 45 |                                 |     |                                                                                                                                                                                                                                                                                                                                       |               |
| 46 |                                 |     |                                                                                                                                                                                                                                                                                                                                       |               |

|    |                               |     |                                                                                                                                                                                                                                                                                     |             |
|----|-------------------------------|-----|-------------------------------------------------------------------------------------------------------------------------------------------------------------------------------------------------------------------------------------------------------------------------------------|-------------|
| 1  | Consent or assent             | 26a | Who will obtain informed consent or assent from potential trial participants or authorised surrogates, and how (see Item 32)                                                                                                                                                        | _____7_____ |
| 2  |                               |     |                                                                                                                                                                                                                                                                                     |             |
| 3  |                               |     |                                                                                                                                                                                                                                                                                     |             |
| 4  |                               | 26b | Additional consent provisions for collection and use of participant data and biological specimens in ancillary studies, if applicable                                                                                                                                               | _____       |
| 5  |                               |     |                                                                                                                                                                                                                                                                                     |             |
| 6  |                               |     |                                                                                                                                                                                                                                                                                     |             |
| 7  | Confidentiality               | 27  | How personal information about potential and enrolled participants will be collected, shared, and maintained in order to protect confidentiality before, during, and after the trial                                                                                                | _____7_____ |
| 8  |                               |     |                                                                                                                                                                                                                                                                                     |             |
| 9  |                               |     |                                                                                                                                                                                                                                                                                     |             |
| 10 | Declaration of interests      | 28  | Financial and other competing interests for principal investigators for the overall trial and each study site                                                                                                                                                                       | _____8_____ |
| 11 |                               |     |                                                                                                                                                                                                                                                                                     |             |
| 12 |                               |     |                                                                                                                                                                                                                                                                                     |             |
| 13 | Access to data                | 29  | Statement of who will have access to the final trial dataset, and disclosure of contractual agreements that limit such access for investigators                                                                                                                                     | _____       |
| 14 |                               |     |                                                                                                                                                                                                                                                                                     |             |
| 15 |                               |     |                                                                                                                                                                                                                                                                                     |             |
| 16 | Ancillary and post-trial care | 30  | Provisions, if any, for ancillary and post-trial care, and for compensation to those who suffer harm from trial participation                                                                                                                                                       | _____       |
| 17 |                               |     |                                                                                                                                                                                                                                                                                     |             |
| 18 |                               |     |                                                                                                                                                                                                                                                                                     |             |
| 19 |                               |     |                                                                                                                                                                                                                                                                                     |             |
| 20 | Dissemination policy          | 31a | Plans for investigators and sponsor to communicate trial results to participants, healthcare professionals, the public, and other relevant groups (eg, via publication, reporting in results databases, or other data sharing arrangements), including any publication restrictions | _____7_____ |
| 21 |                               |     |                                                                                                                                                                                                                                                                                     |             |
| 22 |                               |     |                                                                                                                                                                                                                                                                                     |             |
| 23 |                               |     |                                                                                                                                                                                                                                                                                     |             |
| 24 |                               | 31b | Authorship eligibility guidelines and any intended use of professional writers                                                                                                                                                                                                      | _____       |
| 25 |                               |     |                                                                                                                                                                                                                                                                                     |             |
| 26 |                               | 31c | Plans, if any, for granting public access to the full protocol, participant-level dataset, and statistical code                                                                                                                                                                     | _____       |
| 27 |                               |     |                                                                                                                                                                                                                                                                                     |             |
| 28 |                               |     |                                                                                                                                                                                                                                                                                     |             |
| 29 | <b>Appendices</b>             |     |                                                                                                                                                                                                                                                                                     |             |
| 30 |                               |     |                                                                                                                                                                                                                                                                                     |             |
| 31 | Informed consent materials    | 32  | Model consent form and other related documentation given to participants and authorised surrogates                                                                                                                                                                                  | _____       |
| 32 |                               |     |                                                                                                                                                                                                                                                                                     |             |
| 33 |                               |     |                                                                                                                                                                                                                                                                                     |             |
| 34 | Biological specimens          | 33  | Plans for collection, laboratory evaluation, and storage of biological specimens for genetic or molecular analysis in the current trial and for future use in ancillary studies, if applicable                                                                                      | _____4_____ |
| 35 |                               |     |                                                                                                                                                                                                                                                                                     |             |
| 36 |                               |     |                                                                                                                                                                                                                                                                                     |             |

37 \*It is strongly recommended that this checklist be read in conjunction with the SPIRIT 2013 Explanation & Elaboration for important clarification on the items.  
 38 Amendments to the protocol should be tracked and dated. The SPIRIT checklist is copyrighted by the SPIRIT Group under the Creative Commons  
 39 "[Attribution-NonCommercial-NoDerivs 3.0 Unported](https://creativecommons.org/licenses/by-nc-nd/3.0/)" license.  
 40  
 41  
 42

# BMJ Open

## Effect of tranexamic acid on the prognosis of patients with traumatic brain injury undergoing craniotomy: study protocol for a randomized controlled trial

|                                 |                                                                                                                                                                                                                                                                                                                                                                                                           |
|---------------------------------|-----------------------------------------------------------------------------------------------------------------------------------------------------------------------------------------------------------------------------------------------------------------------------------------------------------------------------------------------------------------------------------------------------------|
| Journal:                        | <i>BMJ Open</i>                                                                                                                                                                                                                                                                                                                                                                                           |
| Manuscript ID                   | bmjopen-2021-049839.R1                                                                                                                                                                                                                                                                                                                                                                                    |
| Article Type:                   | Protocol                                                                                                                                                                                                                                                                                                                                                                                                  |
| Date Submitted by the Author:   | 16-Jul-2021                                                                                                                                                                                                                                                                                                                                                                                               |
| Complete List of Authors:       | Wu, Bei; Capital Medical University, Anesthesiology<br>Lu, Yu; Capital Medical University, Anesthesiology<br>Yu, Yun; Beijing Tiantan Hospital, Anaesthesiology<br>Yue, Hongli; Capital Medical University, Anesthesiology<br>Wang, Jie; Capital Medical University, Anesthesiology<br>Chong, Yingzi; Capital Medical University, Anesthesiology<br>Cui, Weihua; Beijing Tiantan Hospital, Anesthesiology |
| <b>Primary Subject Heading</b>: | Anaesthesia                                                                                                                                                                                                                                                                                                                                                                                               |
| Secondary Subject Heading:      | Complementary medicine                                                                                                                                                                                                                                                                                                                                                                                    |
| Keywords:                       | Anaesthesia in neurology < ANAESTHETICS, Neurological injury < NEUROLOGY, Neurosurgery < SURGERY, Bleeding disorders & coagulopathies < HAEMATOLOGY                                                                                                                                                                                                                                                       |
|                                 |                                                                                                                                                                                                                                                                                                                                                                                                           |

SCHOLARONE™  
Manuscripts



I, the Submitting Author has the right to grant and does grant on behalf of all authors of the Work (as defined in the below author licence), an exclusive licence and/or a non-exclusive licence for contributions from authors who are: i) UK Crown employees; ii) where BMJ has agreed a CC-BY licence shall apply, and/or iii) in accordance with the terms applicable for US Federal Government officers or employees acting as part of their official duties; on a worldwide, perpetual, irrevocable, royalty-free basis to BMJ Publishing Group Ltd ("BMJ") its licensees and where the relevant Journal is co-owned by BMJ to the co-owners of the Journal, to publish the Work in this journal and any other BMJ products and to exploit all rights, as set out in our [licence](#).

The Submitting Author accepts and understands that any supply made under these terms is made by BMJ to the Submitting Author unless you are acting as an employee on behalf of your employer or a postgraduate student of an affiliated institution which is paying any applicable article publishing charge ("APC") for Open Access articles. Where the Submitting Author wishes to make the Work available on an Open Access basis (and intends to pay the relevant APC), the terms of reuse of such Open Access shall be governed by a Creative Commons licence – details of these licences and which [Creative Commons](#) licence will apply to this Work are set out in our licence referred to above.

Other than as permitted in any relevant BMJ Author's Self Archiving Policies, I confirm this Work has not been accepted for publication elsewhere, is not being considered for publication elsewhere and does not duplicate material already published. I confirm all authors consent to publication of this Work and authorise the granting of this licence.

[在此处键入]

[在此处键入]

Version 2.0 Date 2021/7/15

# Effect of tranexamic acid on the prognosis of patients with traumatic brain injury undergoing craniotomy: study protocol for a randomized controlled trial

Bei Wu, Yu Lu\*, Yun Yu, Hongli Yue, Jie Wang, Yingzi Chong, Weihua Cui\*

Department of Anesthesiology, Beijing Tian Tan Hospital, Capital Medical University, Beijing, China

\*Correspondence to Dr. Yu Lu & Dr. Weihua Cui; Address: Department of Anesthesiology Beijing Tian Tan Hospital Capital Medical University No.119, Nan Si Huan Xi Lu, Beijing 100070; Email: luyutiantan@163.com (Yu Lu); weihuacui@ccmu.edu.cn (Weihua Cui).

## Abstract

**Introduction** Abnormal coagulation function aggravate the prognosis of patients with traumatic brain injury (TBI). It was reported that the anti-fibrinolytic drug tranexamic acid (TXA) could reduce intracranial hemorrhage and mortality in non-operative TBI patients. However, there is a lack of evaluation of TXA in TBI patients undergoing craniotomy.

**Methods and analysis** This is a single-centre randomized controlled, double-blind, parallel study aiming to investigate the effectiveness and safety of TXA in TBI patients during the perioperative period. Blood loss and transfusion, neurological function, adverse events, mortality, serum immune-inflammatory cytokines will be collected and analyzed.

**Ethics and dissemination** Ethical approval has been granted by the Medical Ethics Committee of Beijing Tian Tan Hospital, Capital Medical University (reference number: KY 2020-136-03). The results of this study will be disseminated through presentations at scientific conferences and publication in peer-reviewed journals.

**Trial registration number** ChiCTR2100041911.

## Strengths and limitation of this study

➤ This is a randomized controlled, double-blind, parallel study to test the hypothesis



- 1 that TXA could improve prognosis of TBI patients undergoing craniotomy.
- 2 ➤ The study will provide evidence for optimizing perioperative treatment of TBI
- 3 patients undergoing craniotomy.
- 4 ➤ There are nearly five hundred cases of TBI patients that need neurosurgery every
- 5 year at Beijing Tian Tan Hospital, Capital Medical University. It is feasible and
- 6 reasonable to complete the trial in 3 years.
- 7 ➤ The study may not be generalized to other populations since it is a single-centre
- 8 trial.

9 **Key words** Traumatic brain injury; Traumatic coagulation disorder; Tranexamic acid;

10 Systemic inflammatory response

## 12 Introduction

13 About 1.5 million people die each year from traumatic brain injury (TBI), which has

14 become the leading cause of death and disability worldwide. Brain tissue injury and

15 hemorrhage are the main clinical manifestations of TBI. Systemic inflammatory

16 reaction and abnormal coagulation function after TBI can cause secondary brain injury

17 and aggravate cerebral hemorrhage, which has extremely adverse effect on the

18 prognosis.

19 In recent years, many studies<sup>1-3</sup> have shown that abnormal coagulation function is

20 common in TBI patients and is one of the main causes of secondary brain injury. The

21 incidence of coagulation dysfunction on admission is about 26% in TBI patients, and

22 over 60% of them have severe TBI.<sup>4</sup> A prospective study found that TBI patients with

23 abnormal coagulation function had a 4.7-fold increase in mortality and an increased

24 risk of poor prognosis compared with those without abnormal coagulation function.<sup>5</sup>

25 Some studies<sup>2-4 6</sup> have confirmed the interaction between abnormal coagulation

26 function, hyperfibrinolysis and systemic inflammatory reactions.

27 Tranexamic Acid (TXA) have anti-fibrinolytic and anti-inflammatory effect. Studies

28 have reported that early use of TXA can reduce blood loss and mortality in TBI patients

29 with non-surgical treatment.<sup>7 8</sup> Some studies<sup>6 9-12</sup> suggested that the use of TXA could

30 reduce the mortality and disability of the TBI patients and probably does not increase

[在此处键入]

[在此处键入]

Version 2.0 Date 2021/7/15

1 the risk of adverse events. TXA may be a potential treatment for TBI patients.

2 It is generally believed that the abnormal coagulation function after TBI is closely  
3 related to the degree of brain tissue damage. de Oliveira Manoel et al. have shown that  
4 more than 60% of patients have severe TBI are accompanied by abnormal coagulation  
5 function.<sup>4</sup> The incidence of abnormal coagulation function is increased in TBI patients  
6 combined with systemic injury compared with simple TBI patients.<sup>13</sup>

7 Kearney et al have found that severe TBI patients have a higher mortality rate and a  
8 higher degree of abnormality in Glasgow Coma Scale (GCS), Simplified Acute  
9 Physiological Score (SAPS) and disseminated intravascular coagulation (DIC).<sup>14</sup>

10 Urgent decompressive craniotomy is recommended for severe TBI patients with severe  
11 craniocerebral trauma, severe cerebral edema, epidural hematomas and subdural  
12 hematomas to reduce ICP and mortality and improve neurological clinical outcomes.<sup>15</sup>

13 <sup>16</sup> For severe TBI patients complicated by acute traumatic coagulopathy and severe  
14 systemic inflammatory response, promptly correction of coagulopathies and anti-  
15 inflammatory treatment should take into consideration.<sup>16 17</sup> It is not clear whether the  
16 use of TXA can improve the prognosis of TBI patients requiring emergency craniotomy.  
17 It still needs further research to determine the effect of TXA on the systemic  
18 inflammatory reaction and coagulation function in TBI patients undergoing craniotomy  
19 procedures.

20 To sum up, this study intends to evaluate the efficacy and safety of intravenous  
21 administration of TXA in TBI patients undergoing craniotomy procedures. We also aim  
22 to explore the impact of TXA on systemic inflammatory response, coagulation function,  
23 the relationship between these effects and prognosis. This study will provide the basis  
24 for further development of perioperative TXA usage and optimize perioperative  
25 treatment plan for TBI patients.

### 27 **Hypothesis to be tested**

28 In TBI patients undergoing craniotomy, intravenous administration of TXA improves  
29 the patient clinical outcome, alleviates systemic inflammatory response and  
30 coagulation dysfunction.

[在此处键入]

[在此处键入]

1

**2 Specific objectives****3 Primary objectives**

4 Measure whether intravenous administration of TXA improves the GOSE outcome in  
5 TBI patients undergoing craniotomy procedures at discharge.

**6 Secondary objectives**

7 The secondary objectives of this study include the following aspects:

- 8 1. Bleeding: measure whether intravenous administration of TXA for TBI patients  
9 undergoing craniotomy procedures could reduce the intraoperative blood loss and  
10 blood transfusion.
- 11 2. Safety: observe whether intravenous administration of TXA could increase  
12 thrombotic events and postoperative infections for TBI patients undergoing  
13 craniotomy.
- 14 3. Clinical outcome: investigate whether perioperatively administration of TXA could  
15 improve the Coma Recovery Scale - Revised (CRS-R) at discharge, reduce the in-  
16 hospital and 30-day mortality rate of TBI patients undergoing craniotomy.

**17 Exploratory objectives**

18 We will do explored laboratory tests to examine whether TXA could reduce the level  
19 of plasma traumatic stress factors, inflammation biomarkers and the abnormalities of  
20 coagulation indicators.

21

**22 Methods and analysis****23 Study design and setting**

24 This study is a single-centre randomized double-blind placebo-controlled parallel study  
25 to explore the effect of intravenous administration of TXA on the clinical outcome of  
26 TBI patients undergoing craniotomy. From February 2021 to November 2023, TBI  
27 patients undergoing emergency craniotomy will be recruited from Beijing Tian Tan  
28 Hospital, Capital Medical University. Data will be collected consecutively from  
29 patients after written informed consent is obtained.

**30 Inclusion (Eligibility) criteria**

[在此处键入]

[在此处键入]

Version 2.0 Date 2021/7/15

1 1. 18 to 65-year-old TBI patients scheduled for a craniotomy hematoma removal  
2 surgery.

3 2. availability of informed consent.

#### 4 **Exclusion criteria**

5 1. allergic history to TXA;

6 2. taking thrombin;

7 3. taking anticoagulants;

8 4. history of chronic coagulation disorder;

9 5. history of thrombosis (deep vein thrombosis, pulmonary embolism, cerebral  
10 thrombosis, myocardial infarction, thrombophlebitis);

11 6. history of renal insufficiency;

12 7. pregnancy;

13 8. history of epilepsy;

14 9. with mental illness.

15

#### 16 **Intervention**

17 The TXA group will be given TXA 2g (40ml). After the patient is routinely monitored  
18 in the operating room and the peripheral vein is established, injections will be pumped  
19 at the rate of 80ml/hour for 15min (loading dose, 20 mL 1g), and then 2.5ml/hour until  
20 the injection is completed (maintenance dose, 20mL, 1g for 8h).

#### 21 **Placebo**

22 The placebo group will be received an equal volume of normal saline delivered at the  
23 same rate as TXA group.

24

#### 25 **Recruitment procedure and informed consent**

26 Throughout the study period, a professional full-time quality control staff is in charge  
27 of contacting with the emergency department. When TBI patients arrive at the hospital,  
28 this staff will screen the patients for eligibility. All participants in this trial will sign  
29 informed consent documents. A detailed information regarding the study will be  
30 provided focusing on the duration, collection of blood samples and the follow-up plan.

[在此处键入]

[在此处键入]

Version 2.0 Date 2021/7/15

1 The consent forms will be filled up by the anesthesiologist who is in charge of the  
2 anesthesia. A copy of the consent form along with the information sheets will be  
3 provided to each participant. In the consent form, there is a separate provision for  
4 consent of biological samples where the participants may agree or refuse. TBI patients  
5 undergoing neurosurgery are always unconsciousness. Therefore, the entrusted legal  
6 representative of the participants has the right to obtain all relevant information and  
7 sign the consent. They will be given sufficient time to decide whether to participate in  
8 this study. In case of illiterate representatives, we will obtain thumbprints after getting  
9 signature from an impartial witness who is not part of research team. They will be  
10 allowed to withdraw their consent or discontinue participation without restrictions at  
11 any time during the study. The confidentiality of participant records will be protected.

### 13 **Allocation and randomization**

14 After meeting the eligibility criteria and signing the informed consent to participate in  
15 the study, 1288 patients will be randomly allocated in a 1:1 ratio into one of two groups:  
16 (1) TXA group and (2) Placebo group. Each patient is assigned a packet according to  
17 his/her ID number which is sequentially numbered. This packet is only labelled with  
18 general study information and the unique ID number. The list that links the ID number  
19 to the randomization code is kept with the statistician who generated it using Stata  
20 software version 15.1. The statistician is otherwise not involved in the study.

### 22 **Blinding**

23 After the informed consent form is signed and the patient enters the operating room,  
24 the full-time quality control staff not involved in clinical treatment will prepare  
25 TXA/Placebo syringes according to the randomization code for the patients.

26 Patients/representatives, anesthesiologists, and investigators who are responsible for  
27 enrolling and observing the primary and secondary outcomes will be concealed  
28 throughout the study. Blinding will be discontinued after all data collection is  
29 completed. Furthermore, serious life-threatening adverse events leading to prolonged  
30 hospital stay or death will be reported to the principal investigator (PI), and the blinding

[在此处键入]

[在此处键入]

Version 2.0 Date 2021/7/15

1 will be broken following consultation with the PI if necessary.

### 3 **Timeline**

4 The trial was registered at [chictr.org.cn](http://chictr.org.cn) on 10 January 2021 (identifier  
5 ChiCTR2100041911). The study was approved by the Institutional Review Board at  
6 Beijing Tian Tan Hospital, Capital Medical University on 5 January 2021 (reference  
7 number KY2020-136-03). The first participant in the study was enrolled in February  
8 2021 and we plan to enroll for 3 years. End of follow-up of patients will be completed  
9 approximately 30 days after the last enrollment.

### 11 **Anesthesia management**

12 Standardized procedures will be applied.<sup>15 18 19</sup> After the patient enters the operating  
13 room (room temperature is 24 °C ~ 26 °C), standard routine monitoring will be applied,  
14 including non-invasive blood pressure, electrocardiography, pulse oxygen saturation,  
15 end-tidal carbon dioxide partial pressure, and body temperature. The experimental  
16 medicines will be administrated intravenously. Induction drugs will include sufentanil  
17 (0.3 ~ 0.4 mg/kg), etomidate (0.3~ 0.4 mg/kg), and rocuronium (0.6 mg/kg). After  
18 induction, endotracheal intubation will be followed, and the respiratory parameters will  
19 be adjusted to maintain  $P_{ET}CO_2$  within physiological range (35~45 cmH<sub>2</sub>O). Arterial  
20 and central venous catheterization will be established. Intraoperative anesthesia will be  
21 adjusted with propofol (2~6 mg/kg/hour), remifentanil (0.1~0.2 mg/kg/min) and  
22 sevoflurane (0.5~1%) to maintain the MAP  $\geq$  60mmHg, and muscle relaxants will be  
23 added when necessary. After the operation, the tracheal catheter will be kept or  
24 removed (according to circumstances of patients) and patients will be transferred to the  
25 intensive care unit (ICU) or neurosurgical ward.

### 27 **Laboratory procedures**

28 3mL of blood will be collected from the patients before anesthesia, 1 day and 7 days  
29 after surgery. Blood will be centrifuged at 3,000 rotations for 10 minutes, and the  
30 supernatant will be collected and stored at -80 °C.

[在此处键入]

[在此处键入]

Version 2.0 Date 2021/7/15

1 The blood sample will be analyzed for the following:

- 2 1. Traumatic stress factors: Adcorticotropic hormone (ACTH), adrenaline (AD),  
3 Norepinephrine (NE), cortisol, lactic acid.
- 4 2. Immune inflammatory factors: Human monocyte chemotactic protein-1 (McP-1),  
5 tumor necrosis factor- $\alpha$  (TNF- $\alpha$ ), C reactive protein (CRP), peripheral blood  
6 leukocyte count and classification, interleukin-1 (IL-1), IL-6, and IL-10.

## 8 **Follow-up**

9 Clinical prognosis of postoperative outcomes will be collected through telephone or  
10 interview 30 days after admission date. These will include neurological recovery, re-  
11 operation, major postoperative complications, death, etc.

## 13 **Outcomes**

### 14 **Primary outcome**

15 The primary outcome is the Glasgow Outcome Scale - extended (GOSE)<sup>20</sup> at discharge.  
16 The GOSE is the most highly cited outcome scale in studies of TBI. In a review of  
17 outcome measures, Nichol and colleagues listed five features of the ideal outcome scale  
18 for head injury: it should be logistically simple, reliable, valid, stable and free to  
19 administer<sup>21</sup>. The GOSE meet all of these criteria, and is widely recommended as the  
20 main outcome measure in studies of TBI.<sup>22-24</sup> GOSE includes 8 categories: Dead (1),  
21 Vegetative State (2), Lower Severe Disability (3), Upper Severe Disability (4), Lower  
22 Moderate Disability (5), Upper Moderate Disability (6), Lower Good Recovery (7), and  
23 Upper Good Recovery (8). GOSE 1~4 is defined as unfavorable outcome, GOSE 5~8  
24 is defined as favorable outcome.

25 At the day of the discharge, the specially trained staff will go to the ward or ICU to do  
26 the evaluation of GOSE. The discharge time will be determined by the neurosurgeon.

27 A TBI patient will be allowed to discharge when meeting the following conditions: ①  
28 intracranial hematoma is in stable absorption phase; ② intracranial pressure (ICP) is  
29 stable, no more dehydration treatment is needed; ③ no more surgical treatment is

[在此处键入]

[在此处键入]

Version 2.0 Date 2021/7/15

needed; ④ severe complications are controlled well; ⑤ incision is dry without infection and effusion.

### Secondary outcome

1. Intraoperative blood loss: the intraoperative blood loss will be calculated based on the previous study.<sup>25</sup> The blood loss via the suction will be determined by subtracting the added fluids (heparin and saline solutions) from the total volume contained in the surgical canister. The cotton slivers and pieces used during operation will also be calculated at the end of the surgery. A soaked sliver equals 5 mL blood. A soaked pieces equals 1 mL blood.

2. Blood transfusion: we will record the blood transfusion volume during operation and postoperatively in ICU and ward, including red blood cells, fresh frozen plasma, fibrinogen and platelets.

3. Thrombotic events: we will observe the incidence of thrombotic events during hospitalization, including myocardial infarction, pulmonary embolism, deep vein thrombosis, and cerebral infarction.

4. Infections: we will record the incidence of postoperative infection complications, including pneumonia, incision infection, intracranial infection, and urinary system infection.

5. Coma Recovery Scale - Revised (CRS-R):<sup>26</sup> the specially trained staff will estimate the CRS-R of all the participants at the day of discharge. We will choose a cut-off score of 8 in our assessment because of the best odds avoiding false positive and negative errors in our analysis.<sup>27</sup>

6. 30-day mortality rate after surgery.

7. In-hospital mortality rate.

### Exploratory outcomes

1. Hospitalization length and costs: we will record the days of hospitalization after surgery. This will be calculated from the second day after surgery to the discharge day. The hospitalization costs include the total cost, drug costs, examination and laboratory costs and nursing costs. These will be analyzed separately.

2. Traumatic stress and systemic inflammatory response: to evaluate the effect of TXA



[在此处键入]

[在此处键入]

Version 2.0 Date 2021/7/15

1 on traumatic stress and systemic inflammatory response, we will examine the  
2 following plasma biomarkers: ACTH, AD, NE, cortisol, lactic acid, McP-1, TNF-  
3  $\alpha$ , CRP, peripheral blood leukocyte count and classification, IL-1, IL-6, and IL-10.  
4 3. Coagulation functions: the coagulation function and thromboela-stogram (TEG)  
5 will be examined before surgery, 1 day and 7 days after surgery. The coagulation  
6 function test includes the following indicators: thrombin time (TT), fibrinogen  
7 (Fbg), activated partial thromboplastin time (APTT), international standardized  
8 ratio (INR), prothrombin time (PT), fibrin degradation products (FDP).

9

### 10 **Safety considerations, safety monitoring and adverse events (AEs) reporting**

11 All AEs and serious adverse events (SAEs) will be recorded by the study staff. All  
12 immediate AEs intervention will be documented for all participants. All AEs and SAEs  
13 will be followed up until resolution or stabilization as judged by anesthesiologist or  
14 neurosurgeon and the principal investigator (PI). All SAEs will be followed up until  
15 satisfactory resolution or until the treating physicians and the PI deem the event to be  
16 chronic or the participant to be stable.

17 SAEs, which include critical or life-threatening complications or death, will be  
18 documented from the time of enrolment throughout the study period. All SAEs and AEs  
19 will be reported to the Ethics Committees and the Data and Safety Monitoring Board  
20 (DSMB) of the study within 24 hours of awareness of the event.

21

### 22 **Data and Safety Monitoring Boards**

23 The DSMB comprises an anesthesiologist, neurosurgeon, and statistician. The DSMB  
24 is independent from the sponsor and has no competing interest. The DSMB members  
25 will decide the study stopping rules, review the AEs and SAEs reported in the study.  
26 They will determine the severity, cause, and consequences. Any important protocol  
27 modification will be thoroughly communicated with the DSMB members and will  
28 obtain amendment clearance from the institutional review board (IRB). We do not have  
29 a plan to perform interim analyses. Therefore, we do not have stopping guidelines based  
30 on the results of interim analyses.

[在此处键入]

[在此处键入]

Version 2.0 Date 2021/7/15

1

## 2 **Sample size calculations**

3 The reported unfavorable clinical outcome rate in severe TBI patients is 42%-59%.<sup>28-</sup>

4 <sup>30</sup> Our data showed that 54% of TBI patients undergoing craniotomy for hematoma

5 evacuation had unfavorable outcome. Thus, we suppose the unfavorable clinical

6 outcome rate in the placebo group is 54%, and the anticipated unfavorable clinical

7 outcome rate in the TXA group reduce by 15% (54% to 46%). The sample size was

8 calculated with the model of Test for Two Proportions [Differences] in PASS V.11

9 software (NCSS, LLC, USA). Given an alpha level of 0.05, a beta level of 0.2, the total

10 sample size required is 613 in each group. Considering a 5% rate of loss to follow-up,

11 it would be necessary to include 644 participants per group (total: 1288 participants).

12 There are approximately 40 TBI patients undergoing craniotomy in Beijing Tian Tan

13 hospital every month. Such a sample size could be achieved in our study.

14

## 15 **Data collection and management**

16 Investigators will explain the benefits of participating in the trial to patients and/or their

17 authorized representative before surgery. Outcome investigators will receive training

18 on all outcome measures. The anesthesiologist in charge will record the patients'

19 intraoperative data, including blood pressure, heart rate, oxygen saturation, blood loss,

20 urine volume, medicine, infusion volume, transfusion volume and operation time, et al.

21 The data managers will use double data entry to enter data into the EpiData database.

22 An inspector will examine the data, create records, and revise these records as necessary.

23 Each participant will have a unique study identifier, and their data will be recorded by

24 an independent data manager. The data will be electronically stored in the EpiData

25 database and undisclosed to other researchers until the study is completed. The final

26 dataset will be handed over to statistical analysts for statistical analysis. Regular data

27 checks and double data entry will be applied to promote data quality.

28

## 29 **Record retention and archival**

30 All the study documents will be archived by the study sites and retained for three years

[在此处键入]

[在此处键入]

1 after the completion of the study.

2

### 3 **Statistical analysis**

4 Statistical analyses will be performed using STATA V.15.1 statistical software  
5 (Statacorp LLC, USA). All measured data will be reported as the mean  $\pm$  standard  
6 deviation ( $x \pm s$ ), interquartile range (IQR, 25 - 75% percentile), or number (%).

7 For the primary outcome, GOSE 1~4 will be defined as unfavorable outcome, GOSE  
8 5~8 will be defined as favorable outcome. Chi-square test will be used to evaluate the  
9 primary outcome. For the secondary outcomes, we will use t test or rank sum test to  
10 analyze intraoperative blood loss, blood transfusion volume and CRS-R. Chi-square  
11 test or Fisher's exact test will be used to analyze the thrombotic events rate and infection  
12 rate after surgery. Chi-square test or univariate logistic regression analysis will be used  
13 for in-hospital and 30-day mortality rate after surgery. And for the length of  
14 hospitalization and hospitalization costs, we will use rank sum test. Subgroup analysis  
15 will be performed based on age, sex, GCS, time from injury to intervention. Interaction  
16 analysis might be involved to evaluate the differences between TXA group and placebo  
17 group in different subgroups.

18 All randomized participants with informed consent will be analyzed. If unintended  
19 missing data related to the primary outcome account for more than 5%, this will be  
20 handled with multiple imputation. Analyses will be performed according to the  
21 intention-to-treat principle.

22

### 23 **Patient and public involvement**

24 Patients and the public will not be involved in the development of the research or the  
25 design of the study. Study results will be disseminated by publication in a medical  
26 journal and poster presentation at a medical conference.

27

### 28 **Discussion**

29 This study is a single-centre randomized double-blind placebo-controlled parallel  
30 study. To evaluate the influence of perioperative intravenous TXA treatment on the

[在此处键入]

[在此处键入]

Version 2.0 Date 2021/7/15

1 prognosis of TBI patients undergoing craniotomy for hematoma removal after  
2 emergency admission to Beijing Tian Tan Hospital. We also want to explore the  
3 influence of TXA on perioperative coagulation function and systemic inflammatory  
4 response of patients and its relationship with prognosis.

5 The World Health Organization has declared TBI to be the leading cause of death  
6 and disability worldwide by 2020.<sup>31</sup> Cerebral hemorrhage is the main clinical  
7 manifestation of TBI, and traumatic coagulation disorder is the main cause of  
8 progressive aggravation of cerebral hemorrhage. Studies have reported that the  
9 incidence of abnormal coagulation function after TBI is 35.2 % (29.0 %~41.4 %), and  
10 the mortality rate of patients with simple TBI complicated with abnormal coagulation  
11 function is 17~86 %.<sup>32</sup> Compared with TBI patients without coagulation dysfunction,  
12 the mortality rate of TBI patients with coagulation dysfunction is 4.7 times higher, and  
13 the risk of poor prognosis is also increased.<sup>5</sup> The abnormal coagulation function after  
14 TBI is directly related to the degree of brain tissue damage.<sup>14</sup> In addition, systemic  
15 inflammatory response after TBI can aggravate coagulation dysfunction in TBI patients,  
16 which is one of the important causes of secondary brain injury.<sup>33</sup>

17 Studies suggest that the main mechanism leading to abnormal coagulation  
18 function after TBI is the activation of tissue plasminogen, hyperfibrinolysis, and  
19 disruption of the balance between coagulation and bleeding.<sup>34</sup> After severe TBI, a  
20 strong stress response occurs, which then induces systemic inflammatory response  
21 syndrome, leading to increased bleeding, increased blood transfusion, systemic organ  
22 failure, aggravating patients' abnormal coagulation function, and resulting in increased  
23 mortality.<sup>35 36</sup> In addition, excessive consumption of coagulation factors and platelet  
24 dysfunction,<sup>37</sup> hypoperfusion and protein-C pathway activation, hypothermia,  
25 metabolic acidosis, and hemodilution can also lead to coagulation dysfunction after TBI.  
26 <sup>38</sup> In TBI patients, the blood-brain barrier is destroyed, fibrinogen and its degradation  
27 products enter the brain, activate the inflammatory reaction cascade and the immune  
28 response in the brain, leading to lymphocyte infiltration, glial cell activation, cytokine  
29 release and reactive oxygen element production in the brain. These lead to axonal  
30 demyelination and neuronal damage.<sup>39</sup> Therefore, abnormal coagulation function

[在此处键入]

[在此处键入]

Version 2.0 Date 2021/7/15

1 significantly increases the mortality of patients, the regulation of patients' coagulation  
2 function has great clinical significance for improving the prognosis of patients, which  
3 has attracted more and more attention.

4 TXA is an anti-fibrinolytic drug that competitively binds to the fibrinolytic lysine  
5 binding sites and inhibits the fibrinolytic effect of fibrinolytic enzymes. On the other  
6 hand, it has anti-inflammatory effects. Plasmin activates and upregulates a cascade of  
7 inflammatory responses by activating pre-inflammatory cells and inducing pre-  
8 inflammatory gene expression.<sup>40</sup> TXA blocks this inflammatory activation by  
9 inhibiting the conversion of plasminogen to plasmin. Patients undergoing  
10 cardiopulmonary bypass and orthopedic joint replacement are generally treated with  
11 TXA to reduce systemic inflammation and blood loss.<sup>41</sup>

12 TXA is widely used in surgical patients who need blood transfusion and  
13 hemostatic treatment. It can reduce the risk of bleeding and mortality in patients with  
14 TBI.<sup>9</sup> A large randomized controlled study (CRASH-2) involving 20,000 patients in 40  
15 countries found that treatment with TXA within one hour after acute TBI reduced the  
16 risk of death from bleeding by 30%; Treatment with TXA 1 to 3 hours after trauma  
17 reduced the risk of death by 20%. Therefore, TXA may be a potential treatment for TBI  
18 patients. However, for TBI patients undergoing craniotomy for hematoma removal,  
19 there is still less evidence of the influence of TXA on their prognosis.

20 Safety is also our important consideration. TXA has been suggested to be at risk  
21 of cerebral thrombosis and secondary cerebral ischemia.<sup>42</sup> Cerebral ischemia is a  
22 secondary injury after TBI, which can aggravate neurological dysfunction and increase  
23 the mortality and disability.<sup>43 44</sup> TXA may also increase intracranial pressure, leading  
24 to intracranial hypo-perfusion.<sup>45 46</sup> Thrombotic intravascular coagulation increased the  
25 incidence of intracerebral microthrombi.<sup>47</sup> However, a number of studies have shown  
26 that TXA is safe for TBI patients.<sup>6 10 11</sup> A multicentric, large-sample randomized  
27 controlled study (CRASH-3) found that TXA reduced the mortality of mild to moderate  
28 TBI patients without increasing the risk of thrombosis events (RR 0.98 (0.74-1.28), and  
29 there was no significant difference in the risk of epilepsy compared with the placebo  
30 group (1.09 [95% CI 0.90-1.33]).<sup>12</sup> Recently, a Meta-analysis reported that TXA

[在此处键入]

[在此处键入]

Version 2.0 Date 2021/7/15

probably does not increase the risk of adverse events.<sup>48</sup>

To sum up, scientific and effective treatments for TBI patients are needed, and coagulation function is an important clinical indicator affecting the prognosis of TBI patients. In this study, we aim at investigating the effect and safety of perioperative intravenous administration of TXA in TBI patients undergoing craniotomy. We also want to explore the effect of TXA on the inflammatory response and the coagulation function of TBI patients, as well as its relationship with the prognosis. We are aimed at providing a basis for the perioperative TXA treatment for TBI patients and optimizing the perioperative treatment plan for TBI patients.

### **Summary**

In summary, the study aims to investigate the effect and safety of TXA in TBI patients undergoing neurosurgery for hematoma removal. If the result of this study is positive, it will provide evidence for optimal perioperative treatment to improve the prognosis of TBI patients who need craniotomy.

### **Dissemination**

The results of this study will be disseminated through presentations at scientific conferences and publication in scientific journals.

### **Audits**

The data monitoring committee will conduct audits through regular interviews, letters or telephone. The data monitoring committee reserves the right to audit the recruitment of patients at any time. The auditing process will be independent from the investigators.

### **Amendments to the protocol**

Any deviations from the protocol will be fully documented in a report form, reported to all regulatory bodies, and thoroughly recorded in a protocol deviation log. The DSMB and PI will determine the protocol amendments. Protocol amendments will be sent as updated protocols to investigators. A copy of each revised protocol will be added

[在此处键入]

[在此处键入]

Version 2.0 Date 2021/7/15

1 to the Investigator Site File. The protocol will also be updated in the clinical trials  
2 registry website.

3  
4 **Contributors** BW was involved in the conception and design, data collection and  
5 analysis, and manuscript writing. WC and YL were involved in the conception and  
6 design, data collection and analysis, and manuscript revision. YY, JW, HY and YC  
7 were involved in the conception and design, data collection, and manuscript revision.  
8 All authors have read and approved the final manuscript.

9  
10 **Funding** This work was supported by the following grants: Beijing Hospital Authority  
11 Youth Programme (grant number: QML20190508), National Natural Science  
12 Foundation of China (grant number: 81870865), Beijing Municipal Administration of  
13 Hospitals Incubating Program (grant number: PX2019019).

14  
15 **Ethics approval** All procedures in the trial will be conducted in accordance with the  
16 World Medical Association's "Helsinki Declaration (version 19 October 2013)". The  
17 study plan (protocol version 1.0) was approved by the Ethics Committee of Beijing  
18 Tian Tan Hospital, Capital Medical University, China (KY 2020-136-03). This study  
19 protocol has been registered at [chictr.org.cn](http://chictr.org.cn) (ChiCTR2100041911).

#### 20 21 **Strategies to improve the adherence to protocols**

22 The anesthesiologist who implements anesthesia in this study will be trained to obey  
23 the standardized procedure. The investigator staff will be well trained to perform  
24 preoperative recruitment, assessment and postoperative follow-up. We will train the  
25 whole study team to standardly use the assessment scales involves in this study. And  
26 the investigator who will do the assessments will be blind to the intervention.

27  
28 **Open Access** This is an open access article distributed in accordance with the Creative  
29 Commons Attribution - Non Commercial (CC BY- NC 4.0) license, which permits  
30 others to distribute, remix, adapt, build upon this work non- commercially, and license

[在此处键入]

[在此处键入]

Version 2.0 Date 2021/7/15

1 their derivative works on different terms, provided the original work is properly cited,  
2 appropriate credit is given, any changes made indicated, and the use is non- commercial.

3 See: <http://creativecommons.org/licenses/by-nc/4.0/>.

4  
5 **Competing Interests** None declared.

6  
7 **Patient consent for publication** Not required.

8  
9 **Provenance and peer review** Not commissioned; externally peer reviewed.

## 10 11 **References**

- 12 1. Talving P, Benfield R, Hadjizacharia P, et al. Coagulopathy in severe traumatic brain injury:  
13 a prospective study. *J Trauma* 2009;66(1):55-61; discussion 61-2. doi:  
14 10.1097/TA.0b013e318190c3c0 [published Online First: 2009/01/10]
- 15 2. Abdelmalik PA, Boorman DW, Tracy J, et al. Acute Traumatic Coagulopathy Accompanying  
16 Isolated Traumatic Brain Injury is Associated with Worse Long-Term Functional and  
17 Cognitive Outcomes. *Neurocrit Care* 2016;24(3):361-70. doi: 10.1007/s12028-015-  
18 0191-0 [published Online First: 2015/08/22]
- 19 3. Frontera JA, Lewin JJ, 3rd, Rabinstein AA, et al. Guideline for Reversal of Antithrombotics  
20 in Intracranial Hemorrhage: A Statement for Healthcare Professionals from the  
21 Neurocritical Care Society and Society of Critical Care Medicine. *Neurocrit Care*  
22 2016;24(1):6-46. doi: 10.1007/s12028-015-0222-x [published Online First: 2015/12/31]
- 23 4. de Oliveira Manoel AL, Neto AC, Veigas PV, et al. Traumatic brain injury associated  
24 coagulopathy. *Neurocrit Care* 2015;22(1):34-44. doi: 10.1007/s12028-014-0026-4  
25 [published Online First: 2014/07/24]



[在此处键入]

[在此处键入]

Version 2.0 Date 2021/7/15

- 1  
2  
3  
4 1 5. Albert V, Arulsevi S, Agrawal D, et al. Early posttraumatic changes in coagulation and  
5  
6 2 fibrinolysis systems in isolated severe traumatic brain injury patients and its influence  
7  
8  
9 3 on immediate outcome. *Hematol Oncol Stem Cell Ther* 2019;12(1):32-43. doi:  
10  
11 4 10.1016/j.hemonc.2018.09.005 [published Online First: 2018/10/07]  
12  
13  
14 5 6. Ker K, Roberts I, Shakur H, et al. Antifibrinolytic drugs for acute traumatic injury. *Cochrane*  
15  
16 6 *Database Syst Rev* 2015(5):CD004896. doi: 10.1002/14651858.CD004896.pub4  
17  
18 7 [published Online First: 2015/05/10]  
19  
20  
21  
22 8 7. collaborators C-, Roberts I, Shakur H, et al. The importance of early treatment with  
23  
24 9 tranexamic acid in bleeding trauma patients: an exploratory analysis of the CRASH-2  
25  
26 10 randomised controlled trial. *Lancet* 2011;377(9771):1096-101, 101 e1-2. doi:  
27  
28 11 10.1016/S0140-6736(11)60278-X [published Online First: 2011/03/29]  
29  
30  
31  
32 12 8. collaborators C-t, Shakur H, Roberts I, et al. Effects of tranexamic acid on death, vascular  
33  
34 13 occlusive events, and blood transfusion in trauma patients with significant  
35  
36 14 haemorrhage (CRASH-2): a randomised, placebo-controlled trial. *Lancet*  
37  
38 15 2010;376(9734):23-32. doi: 10.1016/S0140-6736(10)60835-5 [published Online First:  
39  
40 16 2010/06/18]  
41  
42  
43  
44  
45 17 9. Yokobori S, Yatabe T, Kondo Y, et al. Efficacy and safety of tranexamic acid administration  
46  
47 18 in traumatic brain injury patients: a systematic review and meta-analysis. *J Intensive*  
48  
49 19 *Care* 2020;8:46. doi: 10.1186/s40560-020-00460-5 [published Online First: 2020/07/09]  
50  
51  
52  
53 20 10. Perel P, Al-Shahi Salman R, Kawahara T, et al. CRASH-2 (Clinical Randomisation of an  
54  
55 21 Antifibrinolytic in Significant Haemorrhage) intracranial bleeding study: the effect of  
56  
57 22 tranexamic acid in traumatic brain injury--a nested randomised, placebo-controlled trial.  
58  
59  
60

[在此处键入]

[在此处键入]

Version 2.0 Date 2021/7/15

- 1 *Health Technol Assess* 2012;16(13):iii-xii, 1-54. doi: 10.3310/hta16130 [published  
2  
3  
4  
5  
6  
7  
8  
9  
10  
11  
12  
13  
14  
15  
16  
17  
18  
19  
20  
21  
22  
23  
24  
25  
26  
27  
28  
29  
30  
31  
32  
33  
34  
35  
36  
37  
38  
39  
40  
41  
42  
43  
44  
45  
46  
47  
48  
49  
50  
51  
52  
53  
54  
55  
56  
57  
58  
59  
60
- 1 *Health Technol Assess* 2012;16(13):iii-xii, 1-54. doi: 10.3310/hta16130 [published  
2  
3  
4  
5  
6  
7  
8  
9  
10  
11  
12  
13  
14  
15  
16  
17  
18  
19  
20  
21  
22  
23  
24  
25  
26  
27  
28  
29  
30  
31  
32  
33  
34  
35  
36  
37  
38  
39  
40  
41  
42  
43  
44  
45  
46  
47  
48  
49  
50  
51  
52  
53  
54  
55  
56  
57  
58  
59  
60
11. Yutthakasemsunt S, Kittiwatanagul W, Piyavechvirat P, et al. Tranexamic acid for patients  
with traumatic brain injury: a randomized, double-blinded, placebo-controlled trial. *BMC  
Emerg Med* 2013;13:20. doi: 10.1186/1471-227X-13-20 [published Online First:  
2013/11/26]
12. collaborators C-t. Effects of tranexamic acid on death, disability, vascular occlusive events  
and other morbidities in patients with acute traumatic brain injury (CRASH-3): a  
randomised, placebo-controlled trial. *Lancet* 2019;394(10210):1713-23. doi:  
10.1016/S0140-6736(19)32233-0 [published Online First: 2019/10/19]
13. Maegele M, Schochl H, Menovsky T, et al. Coagulopathy and haemorrhagic progression in  
traumatic brain injury: advances in mechanisms, diagnosis, and management. *Lancet  
Neurol* 2017;16(8):630-47. doi: 10.1016/S1474-4422(17)30197-7 [published Online  
First: 2017/07/20]
14. Kearney TJ, Benth L, Grode M, et al. Coagulopathy and catecholamines in severe head  
injury. *J Trauma* 1992;32(5):608-11; discussion 11-2. doi: 10.1097/00005373-  
199205000-00012 [published Online First: 1992/05/01]
15. Carney N, Totten AM, O'Reilly C, et al. Guidelines for the Management of Severe Traumatic  
Brain Injury, Fourth Edition. *Neurosurgery* 2017;80(1):6-15. doi:  
10.1227/NEU.0000000000001432 [published Online First: 2016/09/23]
16. Abdelmalik PA, Draghic N, Ling GSF. Management of moderate and severe traumatic brain  
injury. *Transfusion* 2019;59(S2):1529-38. doi: 10.1111/trf.15171 [published Online

[在此处键入]

[在此处键入]

Version 2.0 Date 2021/7/15

- 1  
2  
3  
4 1 First: 2019/04/14]  
5  
6  
7 2 17. Capizzi A, Woo J, Verduzco-Gutierrez M. Traumatic Brain Injury: An Overview of  
8  
9 3 Epidemiology, Pathophysiology, and Medical Management. *Med Clin North Am*  
10  
11 4 2020;104(2):213-38. doi: 10.1016/j.mcna.2019.11.001 [published Online First:  
12  
13 5 2020/02/10]  
14  
15  
16  
17 6 18. Seule M, Brunner T, Mack A, et al. Neurosurgical and Intensive Care Management of  
18  
19 7 Traumatic Brain Injury. *Facial Plast Surg* 2015;31(4):325-31. doi: 10.1055/s-0035-  
20  
21 8 1562884 [published Online First: 2015/09/16]  
22  
23  
24  
25 9 19. Galgano M, Toshkezi G, Qiu X, et al. Traumatic Brain Injury: Current Treatment Strategies  
26  
27 10 and Future Endeavors. *Cell Transplant* 2017;26(7):1118-30. doi:  
28  
29 11 10.1177/0963689717714102 [published Online First: 2017/09/22]  
30  
31  
32  
33 12 20. Yeatts SD, Martin RH, Meurer W, et al. Sliding Scoring of the Glasgow Outcome Scale-  
34  
35 13 Extended as Primary Outcome in Traumatic Brain Injury Trials. *J Neurotrauma*  
36  
37 14 2020;37(24):2674-79. doi: 10.1089/neu.2019.6969 [published Online First: 2020/07/16]  
38  
39  
40  
41 15 21. Nichol AD, Higgins AM, Gabbe BJ, et al. Measuring functional and quality of life outcomes  
42  
43 16 following major head injury: common scales and checklists. *Injury* 2011;42(3):281-7.  
44  
45 17 doi: 10.1016/j.injury.2010.11.047 [published Online First: 2010/12/15]  
46  
47  
48  
49 18 22. Bagiella E, Novack TA, Ansel B, et al. Measuring outcome in traumatic brain injury treatment  
50  
51 19 trials: recommendations from the traumatic brain injury clinical trials network. *J Head*  
52  
53 20 *Trauma Rehabil* 2010;25(5):375-82. doi: 10.1097/HTR.0b013e3181d27fe3 [published  
54  
55 21 Online First: 2010/03/11]  
56  
57  
58  
59 22 23. Ardolino A, Sleat G Fau - Willett K, Willett K. Outcome measurements in major trauma--  
60

[在此处键入]

[在此处键入]

Version 2.0 Date 2021/7/15

- 1 results of a consensus meeting. *Injury* 2012;43(1879-0267 (Electronic)) doi:  
2 10.1016/j.injury.2012.05.008
- 3 24. McMillan T, Wilson L, Ponsford J, et al. The Glasgow Outcome Scale - 40 years of  
4 application and refinement. *Nat Rev Neurol* 2016;12(8):477-85. doi:  
5 10.1038/nrneurol.2016.89 [published Online First: 2016/07/16]
- 6 25. Jaramillo S, Montane-Muntane M, Capitan D, et al. Agreement of surgical blood loss  
7 estimation methods. *Transfusion* 2019;59(2):508-15. doi: 10.1111/trf.15052 [published  
8 Online First: 2018/11/30]
- 9 26. Sattin D, Minati L, Rossi D, et al. The Coma Recovery Scale Modified Score: a new scoring  
10 system for the Coma Recovery Scale-revised for assessment of patients with disorders  
11 of consciousness. *Int J Rehabil Res* 2015;38(4):350-6. doi:  
12 10.1097/MRR.000000000000135 [published Online First: 2015/10/16]
- 13 27. Bodien YG, Carlowicz CA, Chatelle C, et al. Sensitivity and Specificity of the Coma  
14 Recovery Scale--Revised Total Score in Detection of Conscious Awareness. *Arch*  
15 *Phys Med Rehabil* 2016;97(3):490-92 e1. doi: 10.1016/j.apmr.2015.08.422 [published  
16 Online First: 2015/09/08]
- 17 28. Barthelemy EJ, Melis M, Gordon E, et al. Decompressive Craniectomy for Severe  
18 Traumatic Brain Injury: A Systematic Review. *World Neurosurg* 2016;88:411-20. doi:  
19 10.1016/j.wneu.2015.12.044 [published Online First: 2016/01/07]
- 20 29. Bonow RH, Barber J, Temkin NR, et al. The Outcome of Severe Traumatic Brain Injury in  
21 Latin America. *World Neurosurg* 2018;111:e82-e90. doi: 10.1016/j.wneu.2017.11.171  
22 [published Online First: 2017/12/13]

[在此处键入]

[在此处键入]

Version 2.0 Date 2021/7/15

- 1  
2  
3  
4 1 30. Cooper DJ, Rosenfeld JV, Murray L, et al. Patient Outcomes at Twelve Months after Early  
5  
6 2 Decompressive Craniectomy for Diffuse Traumatic Brain Injury in the Randomized  
7  
8 3 DECRA Clinical Trial. *J Neurotrauma* 2020;37(5):810-16. doi: 10.1089/neu.2019.6869  
9  
10 4 [published Online First: 2020/02/07]  
11  
12  
13  
14 5 31. Hyder AA, Wunderlich CA, Puvanachandra P, et al. The impact of traumatic brain injuries:  
15  
16 6 a global perspective. *NeuroRehabilitation* 2007;22(5):341-53. [published Online First:  
17  
18 7 2007/12/29]  
19  
20  
21  
22 8 32. Epstein DS, Mitra B, O'Reilly G, et al. Acute traumatic coagulopathy in the setting of isolated  
23  
24 9 traumatic brain injury: a systematic review and meta-analysis. *Injury* 2014;45(5):819-  
25  
26 10 24. doi: 10.1016/j.injury.2014.01.011 [published Online First: 2014/02/18]  
27  
28  
29  
30 11 33. Brain Trauma F, American Association of Neurological S, Congress of Neurological S, et  
31  
32 12 al. Guidelines for the management of severe traumatic brain injury. IX. Cerebral  
33  
34 13 perfusion thresholds. *J Neurotrauma* 2007;24 Suppl 1:S59-64. doi:  
35  
36 14 10.1089/neu.2007.9987 [published Online First: 2007/05/22]  
37  
38  
39  
40 15 34. Nakae R, Takayama Y, Kuwamoto K, et al. Time Course of Coagulation and Fibrinolytic  
41  
42 16 Parameters in Patients with Traumatic Brain Injury. *J Neurotrauma* 2016;33(7):688-95.  
43  
44 17 doi: 10.1089/neu.2015.4039 [published Online First: 2015/09/29]  
45  
46  
47  
48 18 35. Wada T, Gando S, Maekaw K, et al. Disseminated intravascular coagulation with increased  
49  
50 19 fibrinolysis during the early phase of isolated traumatic brain injury. *Crit Care*  
51  
52 20 2017;21(1):219. doi: 10.1186/s13054-017-1808-9 [published Online First: 2017/08/23]  
53  
54  
55  
56 21 36. Walker PF, Foster AD, Rothberg PA, et al. Tranexamic acid decreases rodent hemorrhagic  
57  
58 22 shock-induced inflammation with mixed end-organ effects. *PLoS One*  
59  
60

[在此处键入]

[在此处键入]

Version 2.0 Date 2021/7/15

- 1  
2  
3  
4 1 2018;13(11):e0208249. doi: 10.1371/journal.pone.0208249 [published Online First:  
5  
6  
7 2 2018/11/30]
- 8  
9 3 37. Solomon C, Traintinger S, Ziegler B, et al. Platelet function following trauma. A multiple  
10  
11 4 electrode aggregometry study. *Thromb Haemost* 2011;106(2):322-30. doi:  
12  
13 5 10.1160/TH11-03-0175 [published Online First: 2011/06/10]
- 16  
17 6 38. Albert V, Subramanian A, Agrawal D, et al. Acute Traumatic Endotheliopathy in Isolated  
18  
19 7 Severe Brain Injury and Its Impact on Clinical Outcome. *Med Sci (Basel)* 2018;6(1) doi:  
20  
21 8 10.3390/medsci6010005 [published Online First: 2018/01/18]
- 23  
24 9 39. Ziliotto N, Bernardi F, Jakimovski D, et al. Coagulation Pathways in Neurological Diseases:  
25  
26 10 Multiple Sclerosis. *Front Neurol* 2019;10:409. doi: 10.3389/fneur.2019.00409  
27  
28 11 [published Online First: 2019/05/10]
- 30  
31 12 40. Singleton Q, Vaibhav K, Braun M, et al. Bone Marrow Derived Extracellular Vesicles  
32  
33 13 Activate Osteoclast Differentiation in Traumatic Brain Injury Induced Bone Loss. *Cells*  
34  
35 14 2019;8(1) doi: 10.3390/cells8010063 [published Online First: 2019/01/20]
- 37  
38 15 41. Wang D, Yang Y, He C, et al. Effect of Multiple Doses of Oral Tranexamic Acid on  
39  
40 16 Haemostasis and Inflammatory Reaction in Total Hip Arthroplasty: A Randomized  
41  
42 17 Controlled Trial. *Thromb Haemost* 2019;119(1):92-103. doi: 10.1055/s-0038-1676625  
43  
44 18 [published Online First: 2019/01/01]
- 46  
47 19 42. Gando S, Sawamura A, Hayakawa M. Trauma, shock, and disseminated intravascular  
48  
49 20 coagulation: lessons from the classical literature. *Ann Surg* 2011;254(1):10-9. doi:  
50  
51 21 10.1097/SLA.0b013e31821221b1 [published Online First: 2011/03/04]
- 53  
54 22 43. Mazzeo AT, Kunene NK, Choi S, et al. Quantitation of ischemic events after severe  
55  
56  
57  
58  
59  
60

[在此处键入]

[在此处键入]

- 1  
2  
3  
4 1 traumatic brain injury in humans: a simple scoring system. *J Neurosurg Anesthesiol*  
5  
6 2 2006;18(3):170-8. doi: 10.1097/01.ana.0000210999.18033.f6 [published Online First:  
7  
8  
9 3 2006/06/27]
- 10  
11 44. Hulka F, Mullins RJ, Frank EH. Blunt brain injury activates the coagulation process. *Arch*  
12  
13  
14 5 *Surg* 1996;131(9):923-7; discussion 27-8. doi:  
15  
16 6 10.1001/archsurg.1996.01430210021004 [published Online First: 1996/09/01]
- 17  
18  
19 45. Burke JF, Stulc JI Fau - Skolarus LE, Skolarus Le Fau - Sears ED, et al. Traumatic brain  
20  
21  
22 8 injury may be an independent risk factor for stroke. (1526-632X (Electronic))
- 23  
24  
25 46. Baharoglu MI, Germans MR, Rinkel GJ, et al. Antifibrinolytic therapy for aneurysmal  
26  
27  
28 10 subarachnoid haemorrhage. *Cochrane Database Syst Rev* 2013(8):CD001245. doi:  
29  
30 11 10.1002/14651858.CD001245.pub2 [published Online First: 2013/08/31]
- 31  
32  
33 47. Kaufman HH, Hui KS, Mattson JC, et al. Clinicopathological correlations of disseminated  
34  
35  
36 13 intravascular coagulation in patients with head injury. *Neurosurgery* 1984;15(1):34-42.  
37  
38 14 doi: 10.1227/00006123-198407000-00008 [published Online First: 1984/07/01]
- 39  
40  
41 48. Lawati KA, Sharif S, Maqbali SA, et al. Efficacy and safety of tranexamic acid in acute  
42  
43  
44 16 traumatic brain injury: a systematic review and meta-analysis of randomized-controlled  
45  
46 17 trials. *Intensive Care Med* 2021;47(1):14-27. doi: 10.1007/s00134-020-06279-w  
47  
48 18 [published Online First: 2020/10/21]
- 49  
50 19

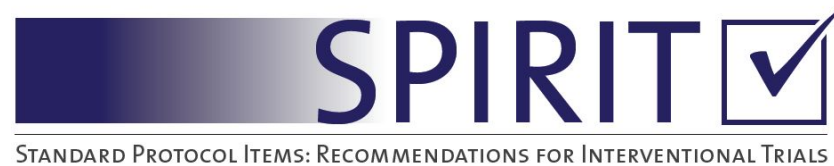

SPIRIT 2013 Checklist: Recommended items to address in a clinical trial protocol and related documents\*

| Section/item                      | Item No | Description                                                                                                                                                                                                                                                                              | Addressed on page number |
|-----------------------------------|---------|------------------------------------------------------------------------------------------------------------------------------------------------------------------------------------------------------------------------------------------------------------------------------------------|--------------------------|
| <b>Administrative information</b> |         |                                                                                                                                                                                                                                                                                          |                          |
| Title                             | 1       | Descriptive title identifying the study design, population, interventions, and, if applicable, trial acronym                                                                                                                                                                             | <u>1</u>                 |
| Trial registration                | 2a      | Trial identifier and registry name. If not yet registered, name of intended registry                                                                                                                                                                                                     | <u>1</u>                 |
|                                   | 2b      | All items from the World Health Organization Trial Registration Data Set                                                                                                                                                                                                                 | <u>1,7,17</u>            |
| Protocol version                  | 3       | Date and version identifier                                                                                                                                                                                                                                                              | <u>top of pages</u>      |
| Funding                           | 4       | Sources and types of financial, material, and other support                                                                                                                                                                                                                              | <u>16</u>                |
| Roles and responsibilities        | 5a      | Names, affiliations, and roles of protocol contributors                                                                                                                                                                                                                                  | <u>1,16</u>              |
|                                   | 5b      | Name and contact information for the trial sponsor                                                                                                                                                                                                                                       | <u>not applicable</u>    |
|                                   | 5c      | Role of study sponsor and funders, if any, in study design; collection, management, analysis, and interpretation of data; writing of the report; and the decision to submit the report for publication, including whether they will have ultimate authority over any of these activities | <u>not applicable</u>    |
|                                   | 5d      | Composition, roles, and responsibilities of the coordinating centre, steering committee, endpoint adjudication committee, data management team, and other individuals or groups overseeing the trial, if applicable (see Item 21a for data monitoring committee)                         | <u>10,11</u>             |



|    |                                                           |     |                                                                                                               |                       |
|----|-----------------------------------------------------------|-----|---------------------------------------------------------------------------------------------------------------|-----------------------|
| 1  | <b>Introduction</b>                                       |     |                                                                                                               |                       |
| 2  |                                                           |     |                                                                                                               |                       |
| 3  | Background and                                            | 6a  | Description of research question and justification for undertaking the trial, including summary of relevant   | <u>2-3</u>            |
| 4  | rationale                                                 |     | studies (published and unpublished) examining benefits and harms for each intervention                        |                       |
| 5  |                                                           |     |                                                                                                               |                       |
| 6  |                                                           | 6b  | Explanation for choice of comparators                                                                         | <u>not applicable</u> |
| 7  |                                                           |     |                                                                                                               |                       |
| 8  | Objectives                                                | 7   | Specific objectives or hypotheses                                                                             | <u>3-4</u>            |
| 9  |                                                           |     |                                                                                                               |                       |
| 10 | Trial design                                              | 8   | Description of trial design including type of trial (eg, parallel group, crossover, factorial, single group), |                       |
| 11 |                                                           |     | allocation ratio, and framework (eg, superiority, equivalence, noninferiority, exploratory)                   | <u>4-5</u>            |
| 12 |                                                           |     |                                                                                                               |                       |
| 13 |                                                           |     |                                                                                                               |                       |
| 14 | <b>Methods: Participants, interventions, and outcomes</b> |     |                                                                                                               |                       |
| 15 |                                                           |     |                                                                                                               |                       |
| 16 | Study setting                                             | 9   | Description of study settings (eg, community clinic, academic hospital) and list of countries where data will | <u>4</u>              |
| 17 |                                                           |     | be collected. Reference to where list of study sites can be obtained                                          |                       |
| 18 |                                                           |     |                                                                                                               |                       |
| 19 | Eligibility criteria                                      | 10  | Inclusion and exclusion criteria for participants. If applicable, eligibility criteria for study centres and  | <u>5</u>              |
| 20 |                                                           |     | individuals who will perform the interventions (eg, surgeons, psychotherapists)                               |                       |
| 21 |                                                           |     |                                                                                                               |                       |
| 22 | Interventions                                             | 11a | Interventions for each group with sufficient detail to allow replication, including how and when they will be | <u>5</u>              |
| 23 |                                                           |     | administered                                                                                                  |                       |
| 24 |                                                           |     |                                                                                                               |                       |
| 25 |                                                           | 11b | Criteria for discontinuing or modifying allocated interventions for a given trial participant (eg, drug dose  | <u>not applicable</u> |
| 26 |                                                           |     | change in response to harms, participant request, or improving/worsening disease)                             |                       |
| 27 |                                                           |     |                                                                                                               |                       |
| 28 |                                                           | 11c | Strategies to improve adherence to intervention protocols, and any procedures for monitoring adherence        | <u>16</u>             |
| 29 |                                                           |     | (eg, drug tablet return, laboratory tests)                                                                    |                       |
| 30 |                                                           |     |                                                                                                               |                       |
| 31 |                                                           | 11d | Relevant concomitant care and interventions that are permitted or prohibited during the trial                 | <u>not applicable</u> |
| 32 |                                                           |     |                                                                                                               |                       |
| 33 | Outcomes                                                  | 12  | Primary, secondary, and other outcomes, including the specific measurement variable (eg, systolic blood       | <u>8-9</u>            |
| 34 |                                                           |     | pressure), analysis metric (eg, change from baseline, final value, time to event), method of aggregation (eg, |                       |
| 35 |                                                           |     | median, proportion), and time point for each outcome. Explanation of the clinical relevance of chosen         |                       |
| 36 |                                                           |     | efficacy and harm outcomes is strongly recommended                                                            |                       |
| 37 |                                                           |     |                                                                                                               |                       |
| 38 | Participant timeline                                      | 13  | Time schedule of enrolment, interventions (including any run-ins and washouts), assessments, and visits for   | <u>7</u>              |
| 39 |                                                           |     | participants. A schematic diagram is highly recommended (see Figure)                                          |                       |
| 40 |                                                           |     |                                                                                                               |                       |
| 41 |                                                           |     |                                                                                                               |                       |
| 42 |                                                           |     |                                                                                                               |                       |
| 43 |                                                           |     |                                                                                                               |                       |
| 44 |                                                           |     |                                                                                                               |                       |
| 45 |                                                           |     |                                                                                                               |                       |
| 46 |                                                           |     |                                                                                                               |                       |

|    |                                                                     |     |                                                                                                                                                                                                                                                                                                                                                                                                              |              |
|----|---------------------------------------------------------------------|-----|--------------------------------------------------------------------------------------------------------------------------------------------------------------------------------------------------------------------------------------------------------------------------------------------------------------------------------------------------------------------------------------------------------------|--------------|
| 1  | Sample size                                                         | 14  | Estimated number of participants needed to achieve study objectives and how it was determined, including clinical and statistical assumptions supporting any sample size calculations                                                                                                                                                                                                                        | <u>11</u>    |
| 2  |                                                                     |     |                                                                                                                                                                                                                                                                                                                                                                                                              |              |
| 3  |                                                                     |     |                                                                                                                                                                                                                                                                                                                                                                                                              |              |
| 4  | Recruitment                                                         | 15  | Strategies for achieving adequate participant enrolment to reach target sample size                                                                                                                                                                                                                                                                                                                          | <u>11</u>    |
| 5  |                                                                     |     |                                                                                                                                                                                                                                                                                                                                                                                                              |              |
| 6  | <b>Methods: Assignment of interventions (for controlled trials)</b> |     |                                                                                                                                                                                                                                                                                                                                                                                                              |              |
| 7  | <b>Allocation:</b>                                                  |     |                                                                                                                                                                                                                                                                                                                                                                                                              |              |
| 8  |                                                                     |     |                                                                                                                                                                                                                                                                                                                                                                                                              |              |
| 9  |                                                                     |     |                                                                                                                                                                                                                                                                                                                                                                                                              |              |
| 10 | Sequence generation                                                 | 16a | Method of generating the allocation sequence (eg, computer-generated random numbers), and list of any factors for stratification. To reduce predictability of a random sequence, details of any planned restriction (eg, blocking) should be provided in a separate document that is unavailable to those who enrol participants or assign interventions                                                     | <u>6</u>     |
| 11 |                                                                     |     |                                                                                                                                                                                                                                                                                                                                                                                                              |              |
| 12 |                                                                     |     |                                                                                                                                                                                                                                                                                                                                                                                                              |              |
| 13 |                                                                     |     |                                                                                                                                                                                                                                                                                                                                                                                                              |              |
| 14 |                                                                     |     |                                                                                                                                                                                                                                                                                                                                                                                                              |              |
| 15 |                                                                     |     |                                                                                                                                                                                                                                                                                                                                                                                                              |              |
| 16 | Allocation concealment mechanism                                    | 16b | Mechanism of implementing the allocation sequence (eg, central telephone; sequentially numbered, opaque, sealed envelopes), describing any steps to conceal the sequence until interventions are assigned                                                                                                                                                                                                    | <u>6</u>     |
| 17 |                                                                     |     |                                                                                                                                                                                                                                                                                                                                                                                                              |              |
| 18 |                                                                     |     |                                                                                                                                                                                                                                                                                                                                                                                                              |              |
| 19 |                                                                     |     |                                                                                                                                                                                                                                                                                                                                                                                                              |              |
| 20 | Implementation                                                      | 16c | Who will generate the allocation sequence, who will enrol participants, and who will assign participants to interventions                                                                                                                                                                                                                                                                                    | <u>6</u>     |
| 21 |                                                                     |     |                                                                                                                                                                                                                                                                                                                                                                                                              |              |
| 22 |                                                                     |     |                                                                                                                                                                                                                                                                                                                                                                                                              |              |
| 23 |                                                                     |     |                                                                                                                                                                                                                                                                                                                                                                                                              |              |
| 24 | Blinding (masking)                                                  | 17a | Who will be blinded after assignment to interventions (eg, trial participants, care providers, outcome assessors, data analysts), and how                                                                                                                                                                                                                                                                    | <u>6-7</u>   |
| 25 |                                                                     |     |                                                                                                                                                                                                                                                                                                                                                                                                              |              |
| 26 |                                                                     |     |                                                                                                                                                                                                                                                                                                                                                                                                              |              |
| 27 |                                                                     | 17b | If blinded, circumstances under which unblinding is permissible, and procedure for revealing a participant's allocated intervention during the trial                                                                                                                                                                                                                                                         | <u>7</u>     |
| 28 |                                                                     |     |                                                                                                                                                                                                                                                                                                                                                                                                              |              |
| 29 |                                                                     |     |                                                                                                                                                                                                                                                                                                                                                                                                              |              |
| 30 |                                                                     |     |                                                                                                                                                                                                                                                                                                                                                                                                              |              |
| 31 | <b>Methods: Data collection, management, and analysis</b>           |     |                                                                                                                                                                                                                                                                                                                                                                                                              |              |
| 32 |                                                                     |     |                                                                                                                                                                                                                                                                                                                                                                                                              |              |
| 33 | Data collection methods                                             | 18a | Plans for assessment and collection of outcome, baseline, and other trial data, including any related processes to promote data quality (eg, duplicate measurements, training of assessors) and a description of study instruments (eg, questionnaires, laboratory tests) along with their reliability and validity, if known. Reference to where data collection forms can be found, if not in the protocol | <u>11-12</u> |
| 34 |                                                                     |     |                                                                                                                                                                                                                                                                                                                                                                                                              |              |
| 35 |                                                                     |     |                                                                                                                                                                                                                                                                                                                                                                                                              |              |
| 36 |                                                                     |     |                                                                                                                                                                                                                                                                                                                                                                                                              |              |
| 37 |                                                                     |     |                                                                                                                                                                                                                                                                                                                                                                                                              |              |
| 38 |                                                                     |     |                                                                                                                                                                                                                                                                                                                                                                                                              |              |
| 39 |                                                                     | 18b | Plans to promote participant retention and complete follow-up, including list of any outcome data to be collected for participants who discontinue or deviate from intervention protocols                                                                                                                                                                                                                    | <u>17</u>    |
| 40 |                                                                     |     |                                                                                                                                                                                                                                                                                                                                                                                                              |              |
| 41 |                                                                     |     |                                                                                                                                                                                                                                                                                                                                                                                                              |              |
| 42 |                                                                     |     |                                                                                                                                                                                                                                                                                                                                                                                                              |              |
| 43 |                                                                     |     |                                                                                                                                                                                                                                                                                                                                                                                                              |              |
| 44 |                                                                     |     |                                                                                                                                                                                                                                                                                                                                                                                                              |              |
| 45 |                                                                     |     |                                                                                                                                                                                                                                                                                                                                                                                                              |              |
| 46 |                                                                     |     |                                                                                                                                                                                                                                                                                                                                                                                                              |              |

|    |                                 |     |                                                                                                                                                                                                                                                                                                                                       |                   |
|----|---------------------------------|-----|---------------------------------------------------------------------------------------------------------------------------------------------------------------------------------------------------------------------------------------------------------------------------------------------------------------------------------------|-------------------|
| 1  | Data management                 | 19  | Plans for data entry, coding, security, and storage, including any related processes to promote data quality (eg, double data entry; range checks for data values). Reference to where details of data management procedures can be found, if not in the protocol                                                                     | <u>11-12</u>      |
| 2  |                                 |     |                                                                                                                                                                                                                                                                                                                                       |                   |
| 3  |                                 |     |                                                                                                                                                                                                                                                                                                                                       |                   |
| 4  |                                 |     |                                                                                                                                                                                                                                                                                                                                       |                   |
| 5  | Statistical methods             | 20a | Statistical methods for analysing primary and secondary outcomes. Reference to where other details of the statistical analysis plan can be found, if not in the protocol                                                                                                                                                              | <u>12</u>         |
| 6  |                                 |     |                                                                                                                                                                                                                                                                                                                                       |                   |
| 7  |                                 |     |                                                                                                                                                                                                                                                                                                                                       |                   |
| 8  |                                 | 20b | Methods for any additional analyses (eg, subgroup and adjusted analyses)                                                                                                                                                                                                                                                              | <u>12</u>         |
| 9  |                                 |     |                                                                                                                                                                                                                                                                                                                                       |                   |
| 10 |                                 | 20c | Definition of analysis population relating to protocol non-adherence (eg, as randomised analysis), and any statistical methods to handle missing data (eg, multiple imputation)                                                                                                                                                       | <u>12-13</u>      |
| 11 |                                 |     |                                                                                                                                                                                                                                                                                                                                       |                   |
| 12 |                                 |     |                                                                                                                                                                                                                                                                                                                                       |                   |
| 13 |                                 |     |                                                                                                                                                                                                                                                                                                                                       |                   |
| 14 | <b>Methods: Monitoring</b>      |     |                                                                                                                                                                                                                                                                                                                                       |                   |
| 15 |                                 |     |                                                                                                                                                                                                                                                                                                                                       |                   |
| 16 | Data monitoring                 | 21a | Composition of data monitoring committee (DMC); summary of its role and reporting structure; statement of whether it is independent from the sponsor and competing interests; and reference to where further details about its charter can be found, if not in the protocol. Alternatively, an explanation of why a DMC is not needed | <u>10-11</u>      |
| 17 |                                 |     |                                                                                                                                                                                                                                                                                                                                       |                   |
| 18 |                                 |     |                                                                                                                                                                                                                                                                                                                                       |                   |
| 19 |                                 |     |                                                                                                                                                                                                                                                                                                                                       |                   |
| 20 |                                 |     |                                                                                                                                                                                                                                                                                                                                       |                   |
| 21 |                                 |     |                                                                                                                                                                                                                                                                                                                                       |                   |
| 22 |                                 | 21b | Description of any interim analyses and stopping guidelines, including who will have access to these interim results and make the final decision to terminate the trial                                                                                                                                                               | <u>11</u>         |
| 23 |                                 |     |                                                                                                                                                                                                                                                                                                                                       |                   |
| 24 |                                 |     |                                                                                                                                                                                                                                                                                                                                       |                   |
| 25 | Harms                           | 22  | Plans for collecting, assessing, reporting, and managing solicited and spontaneously reported adverse events and other unintended effects of trial interventions or trial conduct                                                                                                                                                     | <u>10</u>         |
| 26 |                                 |     |                                                                                                                                                                                                                                                                                                                                       |                   |
| 27 |                                 |     |                                                                                                                                                                                                                                                                                                                                       |                   |
| 28 | Auditing                        | 23  | Frequency and procedures for auditing trial conduct, if any, and whether the process will be independent from investigators and the sponsor                                                                                                                                                                                           | <u>16</u>         |
| 29 |                                 |     |                                                                                                                                                                                                                                                                                                                                       |                   |
| 30 |                                 |     |                                                                                                                                                                                                                                                                                                                                       |                   |
| 31 |                                 |     |                                                                                                                                                                                                                                                                                                                                       |                   |
| 32 | <b>Ethics and dissemination</b> |     |                                                                                                                                                                                                                                                                                                                                       |                   |
| 33 |                                 |     |                                                                                                                                                                                                                                                                                                                                       |                   |
| 34 | Research ethics approval        | 24  | Plans for seeking research ethics committee/institutional review board (REC/IRB) approval                                                                                                                                                                                                                                             | <u>1,10,16,17</u> |
| 35 |                                 |     |                                                                                                                                                                                                                                                                                                                                       |                   |
| 36 |                                 |     |                                                                                                                                                                                                                                                                                                                                       |                   |
| 37 | Protocol amendments             | 25  | Plans for communicating important protocol modifications (eg, changes to eligibility criteria, outcomes, analyses) to relevant parties (eg, investigators, REC/IRBs, trial participants, trial registries, journals, regulators)                                                                                                      | <u>16</u>         |
| 38 |                                 |     |                                                                                                                                                                                                                                                                                                                                       |                   |
| 39 |                                 |     |                                                                                                                                                                                                                                                                                                                                       |                   |
| 40 |                                 |     |                                                                                                                                                                                                                                                                                                                                       |                   |
| 41 |                                 |     |                                                                                                                                                                                                                                                                                                                                       |                   |
| 42 |                                 |     |                                                                                                                                                                                                                                                                                                                                       |                   |

|    |                               |     |                                                                                                                                                                                                                                                                                     |                                      |
|----|-------------------------------|-----|-------------------------------------------------------------------------------------------------------------------------------------------------------------------------------------------------------------------------------------------------------------------------------------|--------------------------------------|
| 1  | Consent or assent             | 26a | Who will obtain informed consent or assent from potential trial participants or authorised surrogates, and how (see Item 32)                                                                                                                                                        | <u>5-6</u>                           |
| 2  |                               |     |                                                                                                                                                                                                                                                                                     |                                      |
| 3  |                               |     |                                                                                                                                                                                                                                                                                     |                                      |
| 4  |                               | 26b | Additional consent provisions for collection and use of participant data and biological specimens in ancillary studies, if applicable                                                                                                                                               | <u>6</u>                             |
| 5  |                               |     |                                                                                                                                                                                                                                                                                     |                                      |
| 6  |                               |     |                                                                                                                                                                                                                                                                                     |                                      |
| 7  | Confidentiality               | 27  | How personal information about potential and enrolled participants will be collected, shared, and maintained in order to protect confidentiality before, during, and after the trial                                                                                                | <u>6</u>                             |
| 8  |                               |     |                                                                                                                                                                                                                                                                                     |                                      |
| 9  |                               |     |                                                                                                                                                                                                                                                                                     |                                      |
| 10 | Declaration of interests      | 28  | Financial and other competing interests for principal investigators for the overall trial and each study site                                                                                                                                                                       | <u>17</u>                            |
| 11 |                               |     |                                                                                                                                                                                                                                                                                     |                                      |
| 12 |                               |     |                                                                                                                                                                                                                                                                                     |                                      |
| 13 | Access to data                | 29  | Statement of who will have access to the final trial dataset, and disclosure of contractual agreements that limit such access for investigators                                                                                                                                     | <u>17</u>                            |
| 14 |                               |     |                                                                                                                                                                                                                                                                                     |                                      |
| 15 |                               |     |                                                                                                                                                                                                                                                                                     |                                      |
| 16 | Ancillary and post-trial care | 30  | Provisions, if any, for ancillary and post-trial care, and for compensation to those who suffer harm from trial participation                                                                                                                                                       | <u>not applicable</u>                |
| 17 |                               |     |                                                                                                                                                                                                                                                                                     |                                      |
| 18 |                               |     |                                                                                                                                                                                                                                                                                     |                                      |
| 19 |                               |     |                                                                                                                                                                                                                                                                                     |                                      |
| 20 | Dissemination policy          | 31a | Plans for investigators and sponsor to communicate trial results to participants, healthcare professionals, the public, and other relevant groups (eg, via publication, reporting in results databases, or other data sharing arrangements), including any publication restrictions | <u>15-16</u>                         |
| 21 |                               |     |                                                                                                                                                                                                                                                                                     |                                      |
| 22 |                               |     |                                                                                                                                                                                                                                                                                     |                                      |
| 23 |                               |     |                                                                                                                                                                                                                                                                                     |                                      |
| 24 |                               | 31b | Authorship eligibility guidelines and any intended use of professional writers                                                                                                                                                                                                      | <u>16</u>                            |
| 25 |                               |     |                                                                                                                                                                                                                                                                                     |                                      |
| 26 |                               | 31c | Plans, if any, for granting public access to the full protocol, participant-level dataset, and statistical code                                                                                                                                                                     | <u>16</u>                            |
| 27 |                               |     |                                                                                                                                                                                                                                                                                     |                                      |
| 28 |                               |     |                                                                                                                                                                                                                                                                                     |                                      |
| 29 | <b>Appendices</b>             |     |                                                                                                                                                                                                                                                                                     |                                      |
| 30 |                               |     |                                                                                                                                                                                                                                                                                     |                                      |
| 31 | Informed consent materials    | 32  | Model consent form and other related documentation given to participants and authorised surrogates                                                                                                                                                                                  | <u>Supplemental for editors only</u> |
| 32 |                               |     |                                                                                                                                                                                                                                                                                     |                                      |
| 33 |                               |     |                                                                                                                                                                                                                                                                                     |                                      |
| 34 | Biological specimens          | 33  | Plans for collection, laboratory evaluation, and storage of biological specimens for genetic or molecular analysis in the current trial and for future use in ancillary studies, if applicable                                                                                      | <u>8</u>                             |
| 35 |                               |     |                                                                                                                                                                                                                                                                                     |                                      |
| 36 |                               |     |                                                                                                                                                                                                                                                                                     |                                      |

\*It is strongly recommended that this checklist be read in conjunction with the SPIRIT 2013 Explanation & Elaboration for important clarification on the items. Amendments to the protocol should be tracked and dated. The SPIRIT checklist is copyrighted by the SPIRIT Group under the Creative Commons "[Attribution-NonCommercial-NoDerivs 3.0 Unported](https://creativecommons.org/licenses/by-nc-nd/3.0/)" license.
